# Supplementary material for: From Oxidative Stress Damage to Pathways, Networks, and Autophagy via MicroRNAs
Source: Hindawi journal article supplement (doi:10.1155/2018/4968321), 2018-01-01
Supplement: f2 [file 4968321.f2.pdf]

**Suppl. Table 2: Common gene targets of microRNAs with possible role in oxidative stress.**

This Table relates to Table 1 and Suppl. Table 1, where gene targets found to be common to 7, 6, or 5 of the 13 oxidative stress-modulated miRNAs were shown. Here we show the full list of gene targets found to be common to  $\geq 2$  of the 13 oxidative stress-modulated miRNAs (i.e. all possible combinations); hsa-let7f (91 elements), hsa-miR-9 (936 elements), hsa-miR-16 (294 elements), hsa-miR-21 (105 elements), hsa-miR-22 (330 elements), hsa-miR-29b (158 elements), hsa-miR-99a (24 elements), hsa-miR-125b (412 elements), hsa-miR-128 (785 elements), hsa-miR-143 (263 elements), hsa-miR-144 (647 elements), hsa-miR-155 (281 elements) and hsa-miR-200c (34 elements). Raw SID1.0 data list is shown. Line numbers indicate code positioning.

The original dataset is: dataset\_58.txt

----- Files in dataset  
-----

|                        |     |          |
|------------------------|-----|----------|
| 1 / 5801-let7f.txt     | 91  | elements |
| 2 / 5802-mir-9.txt     | 936 | elements |
| 3 / 5803-mir-16.txt    | 294 | elements |
| 4 / 5804-miR-21.txt    | 105 | elements |
| 5 / 5805-mir-22.txt    | 330 | elements |
| 6 / 5806-mir-29b.txt   | 158 | elements |
| 7 / 5807-mir-99a.txt   | 24  | elements |
| 8 / 5808-mir-125b.txt  | 412 | elements |
| 9 / 5809-mir-128.txt   | 785 | elements |
| 10 / 5810-mir-143.txt  | 263 | elements |
| 11 / 5811-mir-144.txt  | 647 | elements |
| 12 / 5812-mir-155.txt  | 281 | elements |
| 13 / 5813-mir-200c.txt | 34  | elements |

----- Files in dataset  
-----

\*\*\*\*\* Index of miRNA Codes \*\*\*\*\*

|          |                  |
|----------|------------------|
| SMARCAD1 | 5801-let7f.txt   |
| line 1   |                  |
| SMARCAD1 | 5812-mir-155.txt |
| line 270 |                  |
| BZW1     | 5801-let7f.txt   |
| line 5   |                  |
| BZW1     | 5811-mir-144.txt |
| line 424 |                  |
| ZNF583   | 5801-let7f.txt   |
| line 7   |                  |
| ZNF583   | 5810-mir-143.txt |
| line 14  |                  |
| FNDC3A   | 5801-let7f.txt   |
| line 8   |                  |

|        |     |                   |
|--------|-----|-------------------|
| FNDC3A |     | 5811-mir-144.txt  |
| line   | 15  |                   |
| HIF1AN |     | 5801-let7f.txt    |
| line   | 11  |                   |
| HIF1AN |     | 5805-mir-22.txt   |
| line   | 185 |                   |
| DVL3   |     | 5801-let7f.txt    |
| line   | 15  |                   |
| DVL3   |     | 5808-mir-125b.txt |
| line   | 374 |                   |
| FZD4   |     | 5801-let7f.txt    |
| line   | 19  |                   |
| FZD4   |     | 5811-mir-144.txt  |
| line   | 192 |                   |
| PTAR1  |     | 5801-let7f.txt    |
| line   | 20  |                   |
| PTAR1  |     | 5802-mir-9.txt    |
| line   | 114 |                   |
| PTAR1  |     | 5808-mir-125b.txt |
| line   | 145 |                   |
| PTAR1  |     | 5812-mir-155.txt  |
| line   | 70  |                   |
| MAN2A2 |     | 5801-let7f.txt    |
| line   | 24  |                   |
| MAN2A2 |     | 5809-mir-128.txt  |
| line   | 343 |                   |
| MIB1   |     | 5801-let7f.txt    |
| line   | 26  |                   |
| MIB1   |     | 5803-mir-16.txt   |
| line   | 60  |                   |
| MIB1   |     | 5808-mir-125b.txt |
| line   | 216 |                   |
| CCR7   |     | 5801-let7f.txt    |
| line   | 30  |                   |
| CCR7   |     | 5804-miR-21.txt   |
| line   | 55  |                   |

|         |     |                   |
|---------|-----|-------------------|
| SLC2A12 |     | 5801-let7f.txt    |
| line    | 39  |                   |
| SLC2A12 |     | 5812-mir-155.txt  |
| line    | 76  |                   |
| ZBTB5   |     | 5801-let7f.txt    |
| line    | 41  |                   |
| ZBTB5   |     | 5806-mir-29b.txt  |
| line    | 15  |                   |
| ZBTB5   |     | 5811-mir-144.txt  |
| line    | 484 |                   |
| SNX16   |     | 5801-let7f.txt    |
| line    | 42  |                   |
| SNX16   |     | 5803-mir-16.txt   |
| line    | 106 |                   |
| PRKAA2  |     | 5801-let7f.txt    |
| line    | 43  |                   |
| PRKAA2  |     | 5808-mir-125b.txt |
| line    | 138 |                   |
| PXDN    |     | 5801-let7f.txt    |
| line    | 45  |                   |
| PXDN    |     | 5802-mir-9.txt    |
| line    | 52  |                   |
| SPRYD4  |     | 5801-let7f.txt    |
| line    | 49  |                   |
| SPRYD4  |     | 5802-mir-9.txt    |
| line    | 840 |                   |
| TMED5   |     | 5801-let7f.txt    |
| line    | 50  |                   |
| TMED5   |     | 5809-mir-128.txt  |
| line    | 643 |                   |
| TMED5   |     | 5811-mir-144.txt  |
| line    | 336 |                   |
| SCYL3   |     | 5801-let7f.txt    |
| line    | 52  |                   |
| SCYL3   |     | 5802-mir-9.txt    |
| line    | 313 |                   |

|          |     |                   |
|----------|-----|-------------------|
| GREB1    |     | 5801-let7f.txt    |
| line     | 56  |                   |
| GREB1    |     | 5802-mir-9.txt    |
| line     | 475 |                   |
| CACNG4   |     | 5801-let7f.txt    |
| line     | 58  |                   |
| CACNG4   |     | 5806-mir-29b.txt  |
| line     | 144 |                   |
| PPP1R12B |     | 5801-let7f.txt    |
| line     | 59  |                   |
| PPP1R12B |     | 5808-mir-125b.txt |
| line     | 33  |                   |
| NTRK3    |     | 5801-let7f.txt    |
| line     | 62  |                   |
| NTRK3    |     | 5809-mir-128.txt  |
| line     | 499 |                   |
| DTX4     |     | 5801-let7f.txt    |
| line     | 66  |                   |
| DTX4     |     | 5808-mir-125b.txt |
| line     | 282 |                   |
| DTX4     |     | 5809-mir-128.txt  |
| line     | 175 |                   |
| EIF2C4   |     | 5801-let7f.txt    |
| line     | 67  |                   |
| EIF2C4   |     | 5812-mir-155.txt  |
| line     | 103 |                   |
| SYT1     |     | 5801-let7f.txt    |
| line     | 68  |                   |
| SYT1     |     | 5809-mir-128.txt  |
| line     | 79  |                   |
| IGF1     |     | 5801-let7f.txt    |
| line     | 70  |                   |
| IGF1     |     | 5802-mir-9.txt    |
| line     | 892 |                   |
| IGF1     |     | 5803-mir-16.txt   |
| line     | 281 |                   |
| IGF1     |     | 5809-mir-128.txt  |

|         |     |                   |
|---------|-----|-------------------|
| line    | 741 |                   |
| KTELC1  |     | 5801-let7f.txt    |
| line    | 71  |                   |
| KTELC1  |     | 5809-mir-128.txt  |
| line    | 22  |                   |
| CBL     |     | 5801-let7f.txt    |
| line    | 76  |                   |
| CBL     |     | 5802-mir-9.txt    |
| line    | 853 |                   |
| CBL     |     | 5805-mir-22.txt   |
| line    | 3   |                   |
| CBL     |     | 5810-mir-143.txt  |
| line    | 165 |                   |
| CBL     |     | 5812-mir-155.txt  |
| line    | 108 |                   |
| TIMM17B |     | 5801-let7f.txt    |
| line    | 80  |                   |
| TIMM17B |     | 5808-mir-125b.txt |
| line    | 284 |                   |
| GRIK2   |     | 5801-let7f.txt    |
| line    | 81  |                   |
| GRIK2   |     | 5811-mir-144.txt  |
| line    | 278 |                   |
| LCOR    |     | 5801-let7f.txt    |
| line    | 82  |                   |
| LCOR    |     | 5811-mir-144.txt  |
| line    | 467 |                   |
| BCL7A   |     | 5801-let7f.txt    |
| line    | 83  |                   |
| BCL7A   |     | 5804-miR-21.txt   |
| line    | 39  |                   |
| CALM1   |     | 5801-let7f.txt    |
| line    | 84  |                   |
| CALM1   |     | 5810-mir-143.txt  |
| line    | 210 |                   |
| CCNJL   |     | 5801-let7f.txt    |

|         |     |                   |
|---------|-----|-------------------|
| line    | 85  |                   |
| CCNJL   |     | 5805-mir-22.txt   |
| line    | 20  |                   |
| MGA     |     | 5801-let7f.txt    |
| line    | 86  |                   |
| MGA     |     | 5802-mir-9.txt    |
| line    | 531 |                   |
| ARID3A  |     | 5801-let7f.txt    |
| line    | 87  |                   |
| ARID3A  |     | 5808-mir-125b.txt |
| line    | 293 |                   |
| ICMT    |     | 5801-let7f.txt    |
| line    | 89  |                   |
| ICMT    |     | 5802-mir-9.txt    |
| line    | 422 |                   |
| ICMT    |     | 5807-mir-99a.txt  |
| line    | 22  |                   |
| FBXL19  |     | 5801-let7f.txt    |
| line    | 91  |                   |
| FBXL19  |     | 5802-mir-9.txt    |
| line    | 922 |                   |
| FBXL19  |     | 5805-mir-22.txt   |
| line    | 174 |                   |
| ONECUT2 |     | 5802-mir-9.txt    |
| line    | 1   |                   |
| ONECUT2 |     | 5808-mir-125b.txt |
| line    | 345 |                   |
| ONECUT2 |     | 5809-mir-128.txt  |
| line    | 39  |                   |
| ONECUT2 |     | 5811-mir-144.txt  |
| line    | 39  |                   |
| FBN1    |     | 5802-mir-9.txt    |
| line    | 4   |                   |
| FBN1    |     | 5811-mir-144.txt  |
| line    | 44  |                   |
| ENTPD1  |     | 5802-mir-9.txt    |
| line    | 6   |                   |

|         |     |                   |
|---------|-----|-------------------|
| ENTPD1  |     | 5808-mir-125b.txt |
| line    | 23  |                   |
| SHROOM4 |     | 5802-mir-9.txt    |
| line    | 8   |                   |
| SHROOM4 |     | 5806-mir-29b.txt  |
| line    | 108 |                   |
| GABRB2  |     | 5802-mir-9.txt    |
| line    | 13  |                   |
| GABRB2  |     | 5804-miR-21.txt   |
| line    | 21  |                   |
| GABRB2  |     | 5811-mir-144.txt  |
| line    | 601 |                   |
| PRRX1   |     | 5802-mir-9.txt    |
| line    | 20  |                   |
| PRRX1   |     | 5811-mir-144.txt  |
| line    | 207 |                   |
| PRDM1   |     | 5802-mir-9.txt    |
| line    | 21  |                   |
| PRDM1   |     | 5808-mir-125b.txt |
| line    | 76  |                   |
| SFXN2   |     | 5802-mir-9.txt    |
| line    | 23  |                   |
| SFXN2   |     | 5809-mir-128.txt  |
| line    | 18  |                   |
| CNOT6L  |     | 5802-mir-9.txt    |
| line    | 24  |                   |
| CNOT6L  |     | 5803-mir-16.txt   |
| line    | 29  |                   |
| CNOT6L  |     | 5805-mir-22.txt   |
| line    | 155 |                   |
| CNOT6L  |     | 5811-mir-144.txt  |
| line    | 406 |                   |
| XP04    |     | 5802-mir-9.txt    |
| line    | 25  |                   |
| XP04    |     | 5803-mir-16.txt   |
| line    | 288 |                   |



|          |     |                   |
|----------|-----|-------------------|
| STARD13  |     | 5802-mir-9.txt    |
| line     | 28  |                   |
| STARD13  |     | 5808-mir-125b.txt |
| line     | 1   |                   |
| NID2     |     | 5802-mir-9.txt    |
| line     | 30  |                   |
| NID2     |     | 5811-mir-144.txt  |
| line     | 385 |                   |
| SOCS4    |     | 5802-mir-9.txt    |
| line     | 31  |                   |
| SOCS4    |     | 5808-mir-125b.txt |
| line     | 248 |                   |
| MTHFD2   |     | 5802-mir-9.txt    |
| line     | 33  |                   |
| MTHFD2   |     | 5805-mir-22.txt   |
| line     | 200 |                   |
| MGC13057 |     | 5802-mir-9.txt    |
| line     | 37  |                   |
| MGC13057 |     | 5808-mir-125b.txt |
| line     | 358 |                   |
| KLF5     |     | 5802-mir-9.txt    |
| line     | 41  |                   |
| KLF5     |     | 5804-miR-21.txt   |
| line     | 40  |                   |
| KLF5     |     | 5810-mir-143.txt  |
| line     | 106 |                   |
| ITGA6    |     | 5802-mir-9.txt    |
| line     | 45  |                   |
| ITGA6    |     | 5806-mir-29b.txt  |
| line     | 129 |                   |
| ITGA6    |     | 5810-mir-143.txt  |
| line     | 91  |                   |
| AP1S3    |     | 5802-mir-9.txt    |
| line     | 47  |                   |
| AP1S3    |     | 5811-mir-144.txt  |
| line     | 30  |                   |

|           |                  |
|-----------|------------------|
| MTMR2     | 5802-mir-9.txt   |
| line 49   |                  |
| MTMR2     | 5805-mir-22.txt  |
| line 133  |                  |
| MTMR2     | 5811-mir-144.txt |
| line 581  |                  |
| KIAA1553  | 5802-mir-9.txt   |
| line 53   |                  |
| KIAA1553  | 5809-mir-128.txt |
| line 519  |                  |
| KIAA1553  | 5811-mir-144.txt |
| line 368  |                  |
| CPEB2     | 5802-mir-9.txt   |
| line 55   |                  |
| CPEB2     | 5803-mir-16.txt  |
| line 11   |                  |
| CPEB2     | 5810-mir-143.txt |
| line 237  |                  |
| CPEB2     | 5811-mir-144.txt |
| line 347  |                  |
| KLHL18    | 5802-mir-9.txt   |
| line 59   |                  |
| KLHL18    | 5809-mir-128.txt |
| line 750  |                  |
| C10orf119 | 5802-mir-9.txt   |
| line 62   |                  |
| C10orf119 | 5806-mir-29b.txt |
| line 66   |                  |
| FOXP1     | 5802-mir-9.txt   |
| line 65   |                  |
| FOXP1     | 5805-mir-22.txt  |
| line 217  |                  |
| FOXP1     | 5811-mir-144.txt |
| line 560  |                  |
| NEDD4     | 5802-mir-9.txt   |
| line 67   |                  |
| NEDD4     | 5809-mir-128.txt |
| line 436  |                  |

|        |     |                   |
|--------|-----|-------------------|
| VAV3   |     | 5802-mir-9.txt    |
| line   | 71  |                   |
| VAV3   |     | 5808-mir-125b.txt |
| line   | 354 |                   |
| VAV3   |     | 5809-mir-128.txt  |
| line   | 487 |                   |
| VAV3   |     | 5812-mir-155.txt  |
| line   | 33  |                   |
| RBMS3  |     | 5802-mir-9.txt    |
| line   | 72  |                   |
| RBMS3  |     | 5804-miR-21.txt   |
| line   | 87  |                   |
| RBMS3  |     | 5812-mir-155.txt  |
| line   | 16  |                   |
| NUS1   |     | 5802-mir-9.txt    |
| line   | 75  |                   |
| NUS1   |     | 5809-mir-128.txt  |
| line   | 246 |                   |
| CCNG1  |     | 5802-mir-9.txt    |
| line   | 79  |                   |
| CCNG1  |     | 5809-mir-128.txt  |
| line   | 483 |                   |
| TGFBI  |     | 5802-mir-9.txt    |
| line   | 81  |                   |
| TGFBI  |     | 5804-miR-21.txt   |
| line   | 18  |                   |
| MESDC1 |     | 5802-mir-9.txt    |
| line   | 83  |                   |
| MESDC1 |     | 5809-mir-128.txt  |
| line   | 744 |                   |
| FBN2   |     | 5802-mir-9.txt    |
| line   | 84  |                   |
| FBN2   |     | 5805-mir-22.txt   |
| line   | 269 |                   |
| FBN2   |     | 5811-mir-144.txt  |
| line   | 49  |                   |

|           |                  |
|-----------|------------------|
| DLGAP2    | 5802-mir-9.txt   |
| line 86   |                  |
| DLGAP2    | 5803-mir-16.txt  |
| line 226  |                  |
| DLGAP2    | 5805-mir-22.txt  |
| line 275  |                  |
| DLGAP2    | 5806-mir-29b.txt |
| line 60   |                  |
| LEP       | 5802-mir-9.txt   |
| line 91   |                  |
| LEP       | 5809-mir-128.txt |
| line 728  |                  |
| COL15A1   | 5802-mir-9.txt   |
| line 93   |                  |
| COL15A1   | 5806-mir-29b.txt |
| line 26   |                  |
| ProSAPiP1 | 5802-mir-9.txt   |
| line 94   |                  |
| ProSAPiP1 | 5809-mir-128.txt |
| line 764  |                  |
| NR5A2     | 5802-mir-9.txt   |
| line 100  |                  |
| NR5A2     | 5809-mir-128.txt |
| line 659  |                  |
| ADAMTS3   | 5802-mir-9.txt   |
| line 106  |                  |
| ADAMTS3   | 5811-mir-144.txt |
| line 79   |                  |
| HMGA2     | 5802-mir-9.txt   |
| line 110  |                  |
| HMGA2     | 5803-mir-16.txt  |
| line 167  |                  |
| RBM9      | 5802-mir-9.txt   |
| line 115  |                  |
| RBM9      | 5805-mir-22.txt  |
| line 151  |                  |

|          |                  |
|----------|------------------|
| C1orf173 | 5802-mir-9.txt   |
| line 119 |                  |
| C1orf173 | 5809-mir-128.txt |
| line 409 |                  |
| ZBTB41   | 5802-mir-9.txt   |
| line 120 |                  |
| ZBTB41   | 5803-mir-16.txt  |
| line 222 |                  |
| ZBTB41   | 5812-mir-155.txt |
| line 11  |                  |
| EPHA7    | 5802-mir-9.txt   |
| line 124 |                  |
| EPHA7    | 5811-mir-144.txt |
| line 346 |                  |
| CPEB3    | 5802-mir-9.txt   |
| line 126 |                  |
| CPEB3    | 5803-mir-16.txt  |
| line 68  |                  |
| CPEB3    | 5804-mir-21.txt  |
| line 7   |                  |
| CPEB3    | 5809-mir-128.txt |
| line 665 |                  |
| CPEB3    | 5811-mir-144.txt |
| line 411 |                  |
| SLC5A3   | 5802-mir-9.txt   |
| line 129 |                  |
| SLC5A3   | 5809-mir-128.txt |
| line 261 |                  |
| TTYH2    | 5802-mir-9.txt   |
| line 130 |                  |
| TTYH2    | 5811-mir-144.txt |
| line 341 |                  |
| PCGF5    | 5802-mir-9.txt   |
| line 132 |                  |
| PCGF5    | 5805-mir-22.txt  |
| line 150 |                  |
| MDGA1    | 5802-mir-9.txt   |

|          |                  |
|----------|------------------|
| line 138 |                  |
| MDGA1    | 5809-mir-128.txt |
| line 777 |                  |
| KCNMB2   | 5802-mir-9.txt   |
| line 140 |                  |
| KCNMB2   | 5811-mir-144.txt |
| line 298 |                  |
| VANGL1   | 5802-mir-9.txt   |
| line 142 |                  |
| VANGL1   | 5809-mir-128.txt |
| line 37  |                  |
| VANGL1   | 5811-mir-144.txt |
| line 5   |                  |
| MUM1L1   | 5802-mir-9.txt   |
| line 146 |                  |
| MUM1L1   | 5805-mir-22.txt  |
| line 7   |                  |
| SIX4     | 5802-mir-9.txt   |
| line 149 |                  |
| SIX4     | 5810-mir-143.txt |
| line 55  |                  |
| SIX4     | 5811-mir-144.txt |
| line 334 |                  |
| ZC3H12A  | 5802-mir-9.txt   |
| line 150 |                  |
| ZC3H12A  | 5811-mir-144.txt |
| line 322 |                  |
| SYNJ1    | 5802-mir-9.txt   |
| line 151 |                  |
| SYNJ1    | 5803-mir-16.txt  |
| line 48  |                  |
| TOMM20   | 5802-mir-9.txt   |
| line 160 |                  |
| TOMM20   | 5803-mir-16.txt  |
| line 265 |                  |
| TOMM20   | 5812-mir-155.txt |
| line 126 |                  |

|       |     |                   |
|-------|-----|-------------------|
| GLS   |     | 5802-mir-9.txt    |
| line  | 164 |                   |
| GLS   |     | 5808-mir-125b.txt |
| line  | 226 |                   |
| BACE1 |     | 5802-mir-9.txt    |
| line  | 167 |                   |
| BACE1 |     | 5806-mir-29b.txt  |
| line  | 141 |                   |
| BACE1 |     | 5809-mir-128.txt  |
| line  | 580 |                   |
| HUNK  |     | 5802-mir-9.txt    |
| line  | 171 |                   |
| HUNK  |     | 5805-mir-22.txt   |
| line  | 137 |                   |
| HUNK  |     | 5809-mir-128.txt  |
| line  | 456 |                   |
| PPARA |     | 5802-mir-9.txt    |
| line  | 178 |                   |
| PPARA |     | 5804-miR-21.txt   |
| line  | 34  |                   |
| PPARA |     | 5805-mir-22.txt   |
| line  | 296 |                   |
| PPARA |     | 5809-mir-128.txt  |
| line  | 640 |                   |
| PPARA |     | 5811-mir-144.txt  |
| line  | 258 |                   |
| SIRT1 |     | 5802-mir-9.txt    |
| line  | 179 |                   |
| SIRT1 |     | 5805-mir-22.txt   |
| line  | 43  |                   |
| SIRT1 |     | 5809-mir-128.txt  |
| line  | 402 |                   |
| SIRT1 |     | 5812-mir-155.txt  |
| line  | 224 |                   |
| FOXG1 |     | 5802-mir-9.txt    |
| line  | 182 |                   |
| FOXG1 |     | 5811-mir-144.txt  |
| line  | 494 |                   |

|          |                   |
|----------|-------------------|
| ID4      | 5802-mir-9.txt    |
| line 184 |                   |
| ID4      | 5811-mir-144.txt  |
| line 226 |                   |
| FOXP4    | 5802-mir-9.txt    |
| line 185 |                   |
| FOXP4    | 5809-mir-128.txt  |
| line 692 |                   |
| ATP11B   | 5802-mir-9.txt    |
| line 186 |                   |
| ATP11B   | 5809-mir-128.txt  |
| line 324 |                   |
| FIGNL2   | 5802-mir-9.txt    |
| line 187 |                   |
| FIGNL2   | 5803-mir-16.txt   |
| line 294 |                   |
| RNF111   | 5802-mir-9.txt    |
| line 189 |                   |
| RNF111   | 5803-mir-16.txt   |
| line 207 |                   |
| SMARCD2  | 5802-mir-9.txt    |
| line 190 |                   |
| SMARCD2  | 5808-mir-125b.txt |
| line 340 |                   |
| SMARCD2  | 5810-mir-143.txt  |
| line 250 |                   |
| UBASH3B  | 5802-mir-9.txt    |
| line 197 |                   |
| UBASH3B  | 5808-mir-125b.txt |
| line 295 |                   |
| ASXL1    | 5802-mir-9.txt    |
| line 202 |                   |
| ASXL1    | 5812-mir-155.txt  |
| line 257 |                   |
| SLC9A1   | 5802-mir-9.txt    |



|          |                  |
|----------|------------------|
| line 205 |                  |
| SLC9A1   | 5805-mir-22.txt  |
| line 302 |                  |
| SHROOM2  | 5802-mir-9.txt   |
| line 208 |                  |
| SHROOM2  | 5806-mir-29b.txt |
| line 30  |                  |
| ADAMTS6  | 5802-mir-9.txt   |
| line 209 |                  |
| ADAMTS6  | 5806-mir-29b.txt |
| line 22  |                  |
| PHF8     | 5802-mir-9.txt   |
| line 210 |                  |
| PHF8     | 5805-mir-22.txt  |
| line 55  |                  |
| CLCN5    | 5802-mir-9.txt   |
| line 214 |                  |
| CLCN5    | 5803-mir-16.txt  |
| line 24  |                  |
| CLCN5    | 5805-mir-22.txt  |
| line 279 |                  |
| CLCN5    | 5809-mir-128.txt |
| line 301 |                  |
| CLCN5    | 5812-mir-155.txt |
| line 143 |                  |
| LSM14A   | 5802-mir-9.txt   |
| line 219 |                  |
| LSM14A   | 5811-mir-144.txt |
| line 157 |                  |
| LSM14A   | 5812-mir-155.txt |
| line 83  |                  |
| CCNE2    | 5802-mir-9.txt   |
| line 221 |                  |
| CCNE2    | 5811-mir-144.txt |
| line 281 |                  |
| CCDC6    | 5802-mir-9.txt   |
| line 224 |                  |

|                     |                   |
|---------------------|-------------------|
| CCDC6<br>line 730   | 5809-mir-128.txt  |
| PIGZ<br>line 226    | 5802-mir-9.txt    |
| PIGZ<br>line 302    | 5809-mir-128.txt  |
| ENAH<br>line 228    | 5802-mir-9.txt    |
| ENAH<br>line 157    | 5809-mir-128.txt  |
| ENAH<br>line 592    | 5811-mir-144.txt  |
| ADAMTS9<br>line 230 | 5802-mir-9.txt    |
| ADAMTS9<br>line 12  | 5806-mir-29b.txt  |
| GMEB2<br>line 234   | 5802-mir-9.txt    |
| GMEB2<br>line 363   | 5811-mir-144.txt  |
| S100PBP<br>line 235 | 5802-mir-9.txt    |
| S100PBP<br>line 100 | 5812-mir-155.txt  |
| LIN28<br>line 236   | 5802-mir-9.txt    |
| LIN28<br>line 137   | 5808-mir-125b.txt |
| LIN28<br>line 385   | 5809-mir-128.txt  |
| ANK2<br>line 238    | 5802-mir-9.txt    |
| ANK2<br>line 297    | 5811-mir-144.txt  |
| TULP4<br>line 241   | 5802-mir-9.txt    |

|          |                   |
|----------|-------------------|
| TULP4    | 5811-mir-144.txt  |
| line 330 |                   |
| BAHD1    | 5802-mir-9.txt    |
| line 244 |                   |
| BAHD1    | 5806-mir-29b.txt  |
| line 150 |                   |
| BAHD1    | 5809-mir-128.txt  |
| line 605 |                   |
| ANKRD13A | 5802-mir-9.txt    |
| line 245 |                   |
| ANKRD13A | 5805-mir-22.txt   |
| line 82  |                   |
| ZNF395   | 5802-mir-9.txt    |
| line 247 |                   |
| ZNF395   | 5808-mir-125b.txt |
| line 400 |                   |
| SNRK     | 5802-mir-9.txt    |
| line 249 |                   |
| SNRK     | 5803-mir-16.txt   |
| line 103 |                   |
| SNRK     | 5805-mir-22.txt   |
| line 186 |                   |
| SLC20A2  | 5802-mir-9.txt    |
| line 250 |                   |
| SLC20A2  | 5803-mir-16.txt   |
| line 34  |                   |
| SLC20A2  | 5811-mir-144.txt  |
| line 23  |                   |
| C5orf41  | 5802-mir-9.txt    |
| line 252 |                   |
| C5orf41  | 5809-mir-128.txt  |
| line 557 |                   |
| C5orf41  | 5811-mir-144.txt  |
| line 365 |                   |
| CCDC88A  | 5802-mir-9.txt    |
| line 256 |                   |
| CCDC88A  | 5809-mir-128.txt  |

|          |                  |
|----------|------------------|
| line 469 |                  |
| CCDC88A  | 5811-mir-144.txt |
| line 331 |                  |
| OTUD3    | 5802-mir-9.txt   |
| line 258 |                  |
| OTUD3    | 5811-mir-144.txt |
| line 524 |                  |
| DIXDC1   | 5802-mir-9.txt   |
| line 261 |                  |
| DIXDC1   | 5811-mir-144.txt |
| line 470 |                  |
| ITPKC    | 5802-mir-9.txt   |
| line 262 |                  |
| ITPKC    | 5809-mir-128.txt |
| line 515 |                  |
| CNTN3    | 5802-mir-9.txt   |
| line 264 |                  |
| CNTN3    | 5811-mir-144.txt |
| line 203 |                  |
| ARID1A   | 5802-mir-9.txt   |
| line 267 |                  |
| ARID1A   | 5811-mir-144.txt |
| line 36  |                  |
| RAB34    | 5802-mir-9.txt   |
| line 270 |                  |
| RAB34    | 5812-mir-155.txt |
| line 216 |                  |
| ZIC5     | 5802-mir-9.txt   |
| line 271 |                  |
| ZIC5     | 5806-mir-29b.txt |
| line 110 |                  |
| ERG      | 5802-mir-9.txt   |
| line 272 |                  |
| ERG      | 5809-mir-128.txt |
| line 706 |                  |

|         |     |                  |
|---------|-----|------------------|
| RAPH1   |     | 5802-mir-9.txt   |
| line    | 273 |                  |
| RAPH1   |     | 5812-mir-155.txt |
| line    | 93  |                  |
| FBXL3   |     | 5802-mir-9.txt   |
| line    | 275 |                  |
| FBXL3   |     | 5811-mir-144.txt |
| line    | 97  |                  |
| BCL2L11 |     | 5802-mir-9.txt   |
| line    | 276 |                  |
| BCL2L11 |     | 5811-mir-144.txt |
| line    | 535 |                  |
| TMEM196 |     | 5802-mir-9.txt   |
| line    | 277 |                  |
| TMEM196 |     | 5811-mir-144.txt |
| line    | 150 |                  |
| PBRM1   |     | 5802-mir-9.txt   |
| line    | 278 |                  |
| PBRM1   |     | 5811-mir-144.txt |
| line    | 356 |                  |
| POU2F3  |     | 5802-mir-9.txt   |
| line    | 279 |                  |
| POU2F3  |     | 5809-mir-128.txt |
| line    | 229 |                  |
| KITLG   |     | 5802-mir-9.txt   |
| line    | 280 |                  |
| KITLG   |     | 5809-mir-128.txt |
| line    | 340 |                  |
| KITLG   |     | 5811-mir-144.txt |
| line    | 154 |                  |
| SPG20   |     | 5802-mir-9.txt   |
| line    | 281 |                  |
| SPG20   |     | 5804-miR-21.txt  |
| line    | 75  |                  |
| CPEB4   |     | 5802-mir-9.txt   |
| line    | 283 |                  |

|                    |                  |
|--------------------|------------------|
| CPEB4<br>line 675  | 5809-mir-128.txt |
| HDAC5<br>line 285  | 5802-mir-9.txt   |
| HDAC5<br>line 288  | 5809-mir-128.txt |
| FRMD4A<br>line 294 | 5802-mir-9.txt   |
| FRMD4A<br>line 663 | 5809-mir-128.txt |
| ROD1<br>line 298   | 5802-mir-9.txt   |
| ROD1<br>line 205   | 5810-mir-143.txt |
| ROD1<br>line 500   | 5811-mir-144.txt |
| TGFBR2<br>line 306 | 5802-mir-9.txt   |
| TGFBR2<br>line 86  | 5804-miR-21.txt  |
| TGFBR2<br>line 566 | 5811-mir-144.txt |
| TGFBR2<br>line 260 | 5812-mir-155.txt |
| CEP350<br>line 307 | 5802-mir-9.txt   |
| CEP350<br>line 292 | 5803-mir-16.txt  |
| CEP350<br>line 619 | 5811-mir-144.txt |
| TMCC1<br>line 309  | 5802-mir-9.txt   |
| TMCC1<br>line 507  | 5809-mir-128.txt |
| TMCC1<br>line 482  | 5811-mir-144.txt |
| HK2                | 5802-mir-9.txt   |

|          |     |                   |
|----------|-----|-------------------|
| line     | 310 |                   |
| HK2      |     | 5810-mir-143.txt  |
| line     | 23  |                   |
| SH2B3    |     | 5802-mir-9.txt    |
| line     | 311 |                   |
| SH2B3    |     | 5808-mir-125b.txt |
| line     | 346 |                   |
| SH2B3    |     | 5811-mir-144.txt  |
| line     | 441 |                   |
| NPTX1    |     | 5802-mir-9.txt    |
| line     | 312 |                   |
| NPTX1    |     | 5809-mir-128.txt  |
| line     | 708 |                   |
| NPTX1    |     | 5811-mir-144.txt  |
| line     | 78  |                   |
| TRIM2    |     | 5802-mir-9.txt    |
| line     | 318 |                   |
| TRIM2    |     | 5812-mir-155.txt  |
| line     | 212 |                   |
| RTF1     |     | 5802-mir-9.txt    |
| line     | 322 |                   |
| RTF1     |     | 5803-mir-16.txt   |
| line     | 218 |                   |
| KIAA0240 |     | 5802-mir-9.txt    |
| line     | 324 |                   |
| KIAA0240 |     | 5811-mir-144.txt  |
| line     | 316 |                   |
| BCL11A   |     | 5802-mir-9.txt    |
| line     | 325 |                   |
| BCL11A   |     | 5806-mir-29b.txt  |
| line     | 61  |                   |
| BCL11A   |     | 5811-mir-144.txt  |
| line     | 458 |                   |
| DHX40    |     | 5802-mir-9.txt    |
| line     | 327 |                   |
| DHX40    |     | 5812-mir-155.txt  |
| line     | 58  |                   |

|         |     |                   |
|---------|-----|-------------------|
| ANKH    |     | 5802-mir-9.txt    |
| line    | 329 |                   |
| ANKH    |     | 5808-mir-125b.txt |
| line    | 336 |                   |
|         |     |                   |
| MKL2    |     | 5802-mir-9.txt    |
| line    | 332 |                   |
| MKL2    |     | 5810-mir-143.txt  |
| line    | 131 |                   |
| MKL2    |     | 5811-mir-144.txt  |
| line    | 10  |                   |
|         |     |                   |
| SGK269  |     | 5802-mir-9.txt    |
| line    | 333 |                   |
| SGK269  |     | 5806-mir-29b.txt  |
| line    | 139 |                   |
| SGK269  |     | 5809-mir-128.txt  |
| line    | 754 |                   |
|         |     |                   |
| STK38L  |     | 5802-mir-9.txt    |
| line    | 334 |                   |
| STK38L  |     | 5806-mir-29b.txt  |
| line    | 86  |                   |
| STK38L  |     | 5809-mir-128.txt  |
| line    | 578 |                   |
|         |     |                   |
| FAM46A  |     | 5802-mir-9.txt    |
| line    | 335 |                   |
| FAM46A  |     | 5804-miR-21.txt   |
| line    | 15  |                   |
| FAM46A  |     | 5808-mir-125b.txt |
| line    | 288 |                   |
| FAM46A  |     | 5811-mir-144.txt  |
| line    | 111 |                   |
|         |     |                   |
| UNKL    |     | 5802-mir-9.txt    |
| line    | 339 |                   |
| UNKL    |     | 5806-mir-29b.txt  |
| line    | 137 |                   |
| UNKL    |     | 5809-mir-128.txt  |
| line    | 448 |                   |
|         |     |                   |
| ST8SIA4 |     | 5802-mir-9.txt    |



|          |                   |
|----------|-------------------|
| line 340 |                   |
| ST8SIA4  | 5808-mir-125b.txt |
| line 148 |                   |
| ST8SIA4  | 5810-mir-143.txt  |
| line 207 |                   |
| SSX2IP   | 5802-mir-9.txt    |
| line 341 |                   |
| SSX2IP   | 5811-mir-144.txt  |
| line 55  |                   |
| DYRK2    | 5802-mir-9.txt    |
| line 344 |                   |
| DYRK2    | 5811-mir-144.txt  |
| line 93  |                   |
| KIAA0831 | 5802-mir-9.txt    |
| line 346 |                   |
| KIAA0831 | 5803-mir-16.txt   |
| line 31  |                   |
| GRIK3    | 5802-mir-9.txt    |
| line 348 |                   |
| GRIK3    | 5809-mir-128.txt  |
| line 44  |                   |
| RNF144A  | 5802-mir-9.txt    |
| line 350 |                   |
| RNF144A  | 5808-mir-125b.txt |
| line 375 |                   |
| RNF144A  | 5809-mir-128.txt  |
| line 83  |                   |
| FURIN    | 5802-mir-9.txt    |
| line 351 |                   |
| FURIN    | 5805-mir-22.txt   |
| line 276 |                   |
| FURIN    | 5808-mir-125b.txt |
| line 322 |                   |
| FURIN    | 5809-mir-128.txt  |
| line 703 |                   |
| TLK1     | 5802-mir-9.txt    |
| line 352 |                   |

|         |     |                   |
|---------|-----|-------------------|
| TLK1    |     | 5803-mir-16.txt   |
| line    | 9   |                   |
| ACVR1C  |     | 5802-mir-9.txt    |
| line    | 354 |                   |
| ACVR1C  |     | 5809-mir-128.txt  |
| line    | 590 |                   |
| CAMKK2  |     | 5802-mir-9.txt    |
| line    | 360 |                   |
| CAMKK2  |     | 5811-mir-144.txt  |
| line    | 328 |                   |
| CCNJ    |     | 5802-mir-9.txt    |
| line    | 361 |                   |
| CCNJ    |     | 5808-mir-125b.txt |
| line    | 29  |                   |
| CCNJ    |     | 5809-mir-128.txt  |
| line    | 619 |                   |
| MAP3K1  |     | 5802-mir-9.txt    |
| line    | 365 |                   |
| MAP3K1  |     | 5804-miR-21.txt   |
| line    | 33  |                   |
| AMMECR1 |     | 5802-mir-9.txt    |
| line    | 368 |                   |
| AMMECR1 |     | 5810-mir-143.txt  |
| line    | 224 |                   |
| AMMECR1 |     | 5811-mir-144.txt  |
| line    | 515 |                   |
| SFRS1   |     | 5802-mir-9.txt    |
| line    | 370 |                   |
| SFRS1   |     | 5809-mir-128.txt  |
| line    | 500 |                   |
| PSD3    |     | 5802-mir-9.txt    |
| line    | 371 |                   |
| PSD3    |     | 5810-mir-143.txt  |
| line    | 136 |                   |
| FOXP2   |     | 5802-mir-9.txt    |
| line    | 372 |                   |

|           |                   |
|-----------|-------------------|
| FOXP2     | 5809-mir-128.txt  |
| line 404  |                   |
| IKZF2     | 5802-mir-9.txt    |
| line 373  |                   |
| IKZF2     | 5809-mir-128.txt  |
| line 600  |                   |
| FAM117A   | 5802-mir-9.txt    |
| line 376  |                   |
| FAM117A   | 5805-mir-22.txt   |
| line 270  |                   |
| FAM117A   | 5810-mir-143.txt  |
| line 176  |                   |
| FAM118A   | 5802-mir-9.txt    |
| line 377  |                   |
| FAM118A   | 5808-mir-125b.txt |
| line 136  |                   |
| C14orf147 | 5802-mir-9.txt    |
| line 378  |                   |
| C14orf147 | 5812-mir-155.txt  |
| line 139  |                   |
| CPSF6     | 5802-mir-9.txt    |
| line 382  |                   |
| CPSF6     | 5808-mir-125b.txt |
| line 78   |                   |
| PCDH10    | 5802-mir-9.txt    |
| line 383  |                   |
| PCDH10    | 5811-mir-144.txt  |
| line 572  |                   |
| TNKS      | 5802-mir-9.txt    |
| line 384  |                   |
| TNKS      | 5804-mir-21.txt   |
| line 60   |                   |
| GLDN      | 5802-mir-9.txt    |
| line 387  |                   |
| GLDN      | 5805-mir-22.txt   |
| line 207  |                   |

|            |                    |
|------------|--------------------|
| CLCN4      | 5802-mir-9.txt     |
| line 388   |                    |
| CLCN4      | 5803-mir-16.txt    |
| line 70    |                    |
| <br>CDC14B | <br>5802-mir-9.txt |
| line 389   |                    |
| CDC14B     | 5803-mir-16.txt    |
| line 89    |                    |
| CDC14B     | 5808-mir-125b.txt  |
| line 198   |                    |
| CDC14B     | 5809-mir-128.txt   |
| line 624   |                    |
| CDC14B     | 5811-mir-144.txt   |
| line 184   |                    |
| <br>CNNM1  | <br>5802-mir-9.txt |
| line 390   |                    |
| CNNM1      | 5808-mir-125b.txt  |
| line 202   |                    |
| CNNM1      | 5810-mir-143.txt   |
| line 246   |                    |
| <br>SNF1LK | <br>5802-mir-9.txt |
| line 392   |                    |
| SNF1LK     | 5809-mir-128.txt   |
| line 645   |                    |
| <br>TXNDC5 | <br>5802-mir-9.txt |
| line 393   |                    |
| TXNDC5     | 5809-mir-128.txt   |
| line 338   |                    |
| <br>RNF169 | <br>5802-mir-9.txt |
| line 403   |                    |
| RNF169     | 5806-mir-29b.txt   |
| line 149   |                    |
| <br>SOS1   | <br>5802-mir-9.txt |
| line 407   |                    |
| SOS1       | 5803-mir-16.txt    |
| line 233   |                    |
| SOS1       | 5809-mir-128.txt   |

|          |                   |
|----------|-------------------|
| line 158 |                   |
| SOS1     | 5812-mir-155.txt  |
| line 201 |                   |
| SLC19A2  | 5802-mir-9.txt    |
| line 408 |                   |
| SLC19A2  | 5811-mir-144.txt  |
| line 492 |                   |
| ZBTB39   | 5802-mir-9.txt    |
| line 412 |                   |
| ZBTB39   | 5803-mir-16.txt   |
| line 63  |                   |
| ZBTB39   | 5805-mir-22.txt   |
| line 34  |                   |
| ZBTB39   | 5809-mir-128.txt  |
| line 381 |                   |
| XRN1     | 5802-mir-9.txt    |
| line 414 |                   |
| XRN1     | 5812-mir-155.txt  |
| line 84  |                   |
| MAP7     | 5802-mir-9.txt    |
| line 416 |                   |
| MAP7     | 5803-mir-16.txt   |
| line 97  |                   |
| RHOBTB1  | 5802-mir-9.txt    |
| line 417 |                   |
| RHOBTB1  | 5806-mir-29b.txt  |
| line 51  |                   |
| RHOBTB1  | 5812-mir-155.txt  |
| line 178 |                   |
| ARID3B   | 5802-mir-9.txt    |
| line 431 |                   |
| ARID3B   | 5805-mir-22.txt   |
| line 172 |                   |
| ARID3B   | 5808-mir-125b.txt |
| line 18  |                   |
| ARID3B   | 5810-mir-143.txt  |
| line 109 |                   |

|           |                  |
|-----------|------------------|
| RAB11FIP4 | 5802-mir-9.txt   |
| line 435  |                  |
| RAB11FIP4 | 5811-mir-144.txt |
| line 459  |                  |
| EDEM3     | 5802-mir-9.txt   |
| line 437  |                  |
| EDEM3     | 5809-mir-128.txt |
| line 537  |                  |
| ABI1      | 5802-mir-9.txt   |
| line 442  |                  |
| ABI1      | 5811-mir-144.txt |
| line 40   |                  |
| SLC6A6    | 5802-mir-9.txt   |
| line 444  |                  |
| SLC6A6    | 5809-mir-128.txt |
| line 505  |                  |
| STAC      | 5802-mir-9.txt   |
| line 445  |                  |
| STAC      | 5809-mir-128.txt |
| line 599  |                  |
| STAC      | 5810-mir-143.txt |
| line 36   |                  |
| STAC      | 5811-mir-144.txt |
| line 435  |                  |
| FLRT3     | 5802-mir-9.txt   |
| line 448  |                  |
| FLRT3     | 5809-mir-128.txt |
| line 481  |                  |
| FLRT3     | 5811-mir-144.txt |
| line 230  |                  |
| KIAA1045  | 5802-mir-9.txt   |
| line 451  |                  |
| KIAA1045  | 5809-mir-128.txt |
| line 573  |                  |
| BCL6      | 5802-mir-9.txt   |
| line 452  |                  |
| BCL6      | 5811-mir-144.txt |

line 289

PANK3 5802-mir-9.txt

line 453

PANK3 5804-miR-21.txt

line 92

PANK3 5811-mir-144.txt

line 232

ZBTB34 5802-mir-9.txt

line 455

ZBTB34 5808-mir-125b.txt

line 360

ZBTB34 5809-mir-128.txt

line 432

ZBTB34 5811-mir-144.txt

line 211

MAPKAPK2 5802-mir-9.txt

line 457

MAPKAPK2 5808-mir-125b.txt

line 387

THAP2 5802-mir-9.txt

line 458

THAP2 5807-mir-99a.txt

line 1

THAP2 5809-mir-128.txt

line 146

EIF5A2 5802-mir-9.txt

line 469

EIF5A2 5803-mir-16.txt

line 280

EIF5A2 5808-mir-125b.txt

line 281

KLHDC5 5802-mir-9.txt

line 470

KLHDC5 5804-miR-21.txt

line 35

KLHDC5 5805-mir-22.txt

line 211

|          |                   |
|----------|-------------------|
| COL5A1   | 5802-mir-9.txt    |
| line 471 |                   |
| COL5A1   | 5809-mir-128.txt  |
| line 335 |                   |
| COL5A1   | 5810-mir-143.txt  |
| line 148 |                   |
| AFAP1    | 5802-mir-9.txt    |
| line 476 |                   |
| AFAP1    | 5809-mir-128.txt  |
| line 628 |                   |
| AFAP1    | 5811-mir-144.txt  |
| line 373 |                   |
| RPS6KA4  | 5802-mir-9.txt    |
| line 477 |                   |
| RPS6KA4  | 5809-mir-128.txt  |
| line 781 |                   |
| PDE7B    | 5802-mir-9.txt    |
| line 478 |                   |
| PDE7B    | 5809-mir-128.txt  |
| line 192 |                   |
| PDE7B    | 5811-mir-144.txt  |
| line 404 |                   |
| ATOH8    | 5802-mir-9.txt    |
| line 482 |                   |
| ATOH8    | 5808-mir-125b.txt |
| line 325 |                   |
| PHF20L1  | 5802-mir-9.txt    |
| line 484 |                   |
| PHF20L1  | 5811-mir-144.txt  |
| line 621 |                   |
| PURA     | 5802-mir-9.txt    |
| line 487 |                   |
| PURA     | 5811-mir-144.txt  |
| line 128 |                   |
| FOXN3    | 5802-mir-9.txt    |
| line 489 |                   |
| FOXN3    | 5809-mir-128.txt  |



|        |     |                   |
|--------|-----|-------------------|
| line   | 503 |                   |
| TGOLN2 |     | 5802-mir-9.txt    |
| line   | 496 |                   |
| TGOLN2 |     | 5808-mir-125b.txt |
| line   | 50  |                   |
| TGOLN2 |     | 5809-mir-128.txt  |
| line   | 597 |                   |
| NOTCH2 |     | 5802-mir-9.txt    |
| line   | 499 |                   |
| NOTCH2 |     | 5803-mir-16.txt   |
| line   | 61  |                   |
| VCL    |     | 5802-mir-9.txt    |
| line   | 500 |                   |
| VCL    |     | 5806-mir-29b.txt  |
| line   | 148 |                   |
| KIF21A |     | 5802-mir-9.txt    |
| line   | 502 |                   |
| KIF21A |     | 5803-mir-16.txt   |
| line   | 25  |                   |
| TES    |     | 5802-mir-9.txt    |
| line   | 503 |                   |
| TES    |     | 5811-mir-144.txt  |
| line   | 412 |                   |
| RAB33B |     | 5802-mir-9.txt    |
| line   | 504 |                   |
| RAB33B |     | 5809-mir-128.txt  |
| line   | 109 |                   |
| ZNF248 |     | 5802-mir-9.txt    |
| line   | 507 |                   |
| ZNF248 |     | 5812-mir-155.txt  |
| line   | 132 |                   |
| KLF12  |     | 5802-mir-9.txt    |
| line   | 508 |                   |
| KLF12  |     | 5804-miR-21.txt   |
| line   | 42  |                   |
| KLF12  |     | 5811-mir-144.txt  |

|          |     |                   |
|----------|-----|-------------------|
| line     | 296 |                   |
| NEBL     |     | 5802-mir-9.txt    |
| line     | 513 |                   |
| NEBL     |     | 5806-mir-29b.txt  |
| line     | 128 |                   |
| PIP4K2B  |     | 5802-mir-9.txt    |
| line     | 515 |                   |
| PIP4K2B  |     | 5805-mir-22.txt   |
| line     | 89  |                   |
| PIP4K2B  |     | 5808-mir-125b.txt |
| line     | 338 |                   |
| AEBP2    |     | 5802-mir-9.txt    |
| line     | 517 |                   |
| AEBP2    |     | 5811-mir-144.txt  |
| line     | 394 |                   |
| MAP2K7   |     | 5802-mir-9.txt    |
| line     | 521 |                   |
| MAP2K7   |     | 5808-mir-125b.txt |
| line     | 146 |                   |
| MAP2K7   |     | 5809-mir-128.txt  |
| line     | 297 |                   |
| CD47     |     | 5802-mir-9.txt    |
| line     | 528 |                   |
| CD47     |     | 5812-mir-155.txt  |
| line     | 120 |                   |
| HOXD1    |     | 5802-mir-9.txt    |
| line     | 539 |                   |
| HOXD1    |     | 5808-mir-125b.txt |
| line     | 308 |                   |
| FXR1     |     | 5802-mir-9.txt    |
| line     | 540 |                   |
| FXR1     |     | 5812-mir-155.txt  |
| line     | 185 |                   |
| KIAA1217 |     | 5802-mir-9.txt    |
| line     | 541 |                   |
| KIAA1217 |     | 5811-mir-144.txt  |

|       |     |                   |
|-------|-----|-------------------|
| line  | 212 |                   |
| EN2   |     | 5802-mir-9.txt    |
| line  | 543 |                   |
| EN2   |     | 5809-mir-128.txt  |
| line  | 689 |                   |
| EN2   |     | 5812-mir-155.txt  |
| line  | 82  |                   |
| FOXQ1 |     | 5802-mir-9.txt    |
| line  | 548 |                   |
| FOXQ1 |     | 5809-mir-128.txt  |
| line  | 318 |                   |
| ETS1  |     | 5802-mir-9.txt    |
| line  | 551 |                   |
| ETS1  |     | 5811-mir-144.txt  |
| line  | 159 |                   |
| ETS1  |     | 5812-mir-155.txt  |
| line  | 42  |                   |
| GAB2  |     | 5802-mir-9.txt    |
| line  | 553 |                   |
| GAB2  |     | 5808-mir-125b.txt |
| line  | 392 |                   |
| LPP   |     | 5802-mir-9.txt    |
| line  | 554 |                   |
| LPP   |     | 5805-mir-22.txt   |
| line  | 299 |                   |
| LPP   |     | 5808-mir-125b.txt |
| line  | 238 |                   |
| TRAM1 |     | 5802-mir-9.txt    |
| line  | 560 |                   |
| TRAM1 |     | 5803-mir-16.txt   |
| line  | 95  |                   |
| HRB   |     | 5802-mir-9.txt    |
| line  | 561 |                   |
| HRB   |     | 5809-mir-128.txt  |
| line  | 603 |                   |
| HRB   |     | 5811-mir-144.txt  |
| line  | 543 |                   |

|          |                   |
|----------|-------------------|
| PIK3C2A  | 5802-mir-9.txt    |
| line 563 |                   |
| PIK3C2A  | 5811-mir-144.txt  |
| line 260 |                   |
| GJC1     | 5802-mir-9.txt    |
| line 564 |                   |
| GJC1     | 5808-mir-125b.txt |
| line 59  |                   |
| PHTF2    | 5802-mir-9.txt    |
| line 566 |                   |
| PHTF2    | 5811-mir-144.txt  |
| line 308 |                   |
| PHTF2    | 5813-mir-200c.txt |
| line 10  |                   |
| PALM2    | 5802-mir-9.txt    |
| line 567 |                   |
| PALM2    | 5809-mir-128.txt  |
| line 564 |                   |
| PALM2    | 5811-mir-144.txt  |
| line 357 |                   |
| PALM2    | 5812-mir-155.txt  |
| line 278 |                   |
| WAPAL    | 5802-mir-9.txt    |
| line 568 |                   |
| WAPAL    | 5803-mir-16.txt   |
| line 206 |                   |
| DYRK1A   | 5802-mir-9.txt    |
| line 571 |                   |
| DYRK1A   | 5811-mir-144.txt  |
| line 408 |                   |
| AAK1     | 5802-mir-9.txt    |
| line 573 |                   |
| AAK1     | 5812-mir-155.txt  |
| line 155 |                   |
| TMEM170B | 5802-mir-9.txt    |
| line 574 |                   |

|          |                   |
|----------|-------------------|
| TMEM170B | 5803-mir-16.txt   |
| line 272 |                   |
| TMEM170B | 5808-mir-125b.txt |
| line 133 |                   |
| TMEM170B | 5809-mir-128.txt  |
| line 437 |                   |
| SYT10    | 5802-mir-9.txt    |
| line 575 |                   |
| SYT10    | 5803-mir-16.txt   |
| line 39  |                   |
| BRUNOL6  | 5802-mir-9.txt    |
| line 576 |                   |
| BRUNOL6  | 5806-mir-29b.txt  |
| line 113 |                   |
| PLEKHA1  | 5802-mir-9.txt    |
| line 578 |                   |
| PLEKHA1  | 5806-mir-29b.txt  |
| line 88  |                   |
| RIPK5    | 5802-mir-9.txt    |
| line 580 |                   |
| RIPK5    | 5811-mir-144.txt  |
| line 585 |                   |
| YPEL2    | 5802-mir-9.txt    |
| line 581 |                   |
| YPEL2    | 5809-mir-128.txt  |
| line 376 |                   |
| RBM24    | 5802-mir-9.txt    |
| line 582 |                   |
| RBM24    | 5803-mir-16.txt   |
| line 102 |                   |
| RBM24    | 5810-mir-143.txt  |
| line 57  |                   |
| WDTC1    | 5802-mir-9.txt    |
| line 585 |                   |
| WDTC1    | 5805-mir-22.txt   |
| line 289 |                   |
| WDTC1    | 5809-mir-128.txt  |

line 533

CREB5

5802-mir-9.txt

line 588

CREB5

5810-mir-143.txt

line 134

DCUN1D4

5802-mir-9.txt

line 590

DCUN1D4

5809-mir-128.txt

line 34

DCUN1D4

5811-mir-144.txt

line 416

C1orf144

5802-mir-9.txt

line 591

C1orf144

5805-mir-22.txt

line 321

C1orf144

5808-mir-125b.txt

line 224

C1orf144

5809-mir-128.txt

line 1

PJA2

5802-mir-9.txt

line 592

PJA2

5811-mir-144.txt

line 433

SON

5802-mir-9.txt

line 594

SON

5811-mir-144.txt

line 130

MBNL1

5802-mir-9.txt

line 596

MBNL1

5807-mir-99a.txt

line 16

MBNL1

5811-mir-144.txt

line 81

ADAMTS5

5802-mir-9.txt

line 597

ADAMTS5

5803-mir-16.txt

line 176

|          |                   |
|----------|-------------------|
| ADAMTS5  | 5805-mir-22.txt   |
| line 298 |                   |
| ADAMTS5  | 5809-mir-128.txt  |
| line 23  |                   |
| ZBTB38   | 5802-mir-9.txt    |
| line 598 |                   |
| ZBTB38   | 5808-mir-125b.txt |
| line 355 |                   |
| ZBTB38   | 5811-mir-144.txt  |
| line 109 |                   |
| ZBTB38   | 5812-mir-155.txt  |
| line 6   |                   |
| DCP2     | 5802-mir-9.txt    |
| line 600 |                   |
| DCP2     | 5809-mir-128.txt  |
| line 346 |                   |
| AK3L1    | 5802-mir-9.txt    |
| line 601 |                   |
| AK3L1    | 5803-mir-16.txt   |
| line 85  |                   |
| ZBTB44   | 5802-mir-9.txt    |
| line 602 |                   |
| ZBTB44   | 5803-mir-16.txt   |
| line 21  |                   |
| ZBTB44   | 5810-mir-143.txt  |
| line 22  |                   |
| MAF      | 5802-mir-9.txt    |
| line 603 |                   |
| MAF      | 5808-mir-125b.txt |
| line 314 |                   |
| MAF      | 5810-mir-143.txt  |
| line 122 |                   |
| SCN2B    | 5802-mir-9.txt    |
| line 604 |                   |
| SCN2B    | 5808-mir-125b.txt |
| line 364 |                   |
| SCN2B    | 5810-mir-143.txt  |
| line 138 |                   |

|          |                   |
|----------|-------------------|
| CBFA2T2  | 5802-mir-9.txt    |
| line 607 |                   |
| CBFA2T2  | 5811-mir-144.txt  |
| line 315 |                   |
| ADAM11   | 5802-mir-9.txt    |
| line 608 |                   |
| ADAM11   | 5805-mir-22.txt   |
| line 248 |                   |
| ADAM11   | 5808-mir-125b.txt |
| line 315 |                   |
| RYBP     | 5802-mir-9.txt    |
| line 611 |                   |
| RYBP     | 5809-mir-128.txt  |
| line 46  |                   |
| FAM81A   | 5802-mir-9.txt    |
| line 612 |                   |
| FAM81A   | 5803-mir-16.txt   |
| line 72  |                   |
| AFF1     | 5802-mir-9.txt    |
| line 613 |                   |
| AFF1     | 5810-mir-143.txt  |
| line 19  |                   |
| PHF19    | 5802-mir-9.txt    |
| line 618 |                   |
| PHF19    | 5803-mir-16.txt   |
| line 7   |                   |
| HIC2     | 5802-mir-9.txt    |
| line 619 |                   |
| HIC2     | 5808-mir-125b.txt |
| line 396 |                   |
| ATXN3    | 5802-mir-9.txt    |
| line 623 |                   |
| ATXN3    | 5808-mir-125b.txt |
| line 241 |                   |
| C18orf25 | 5802-mir-9.txt    |



|          |                   |
|----------|-------------------|
| line 629 |                   |
| C18orf25 | 5809-mir-128.txt  |
| line 775 |                   |
| NCOR2    | 5802-mir-9.txt    |
| line 632 |                   |
| NCOR2    | 5803-mir-16.txt   |
| line 203 |                   |
| NCOR2    | 5808-mir-125b.txt |
| line 240 |                   |
| ABL2     | 5802-mir-9.txt    |
| line 634 |                   |
| ABL2     | 5808-mir-125b.txt |
| line 221 |                   |
| ABL2     | 5809-mir-128.txt  |
| line 152 |                   |
| ABL2     | 5810-mir-143.txt  |
| line 2   |                   |
| AK2      | 5802-mir-9.txt    |
| line 635 |                   |
| AK2      | 5809-mir-128.txt  |
| line 48  |                   |
| PLEKHA6  | 5802-mir-9.txt    |
| line 636 |                   |
| PLEKHA6  | 5805-mir-22.txt   |
| line 178 |                   |
| RC3H1    | 5802-mir-9.txt    |
| line 641 |                   |
| RC3H1    | 5811-mir-144.txt  |
| line 597 |                   |
| ANKRD12  | 5802-mir-9.txt    |
| line 642 |                   |
| ANKRD12  | 5810-mir-143.txt  |
| line 33  |                   |
| LARP1    | 5802-mir-9.txt    |
| line 643 |                   |
| LARP1    | 5810-mir-143.txt  |
| line 214 |                   |

|          |     |                   |
|----------|-----|-------------------|
| LIFR     |     | 5802-mir-9.txt    |
| line     | 644 |                   |
| LIFR     |     | 5804-miR-21.txt   |
| line     | 14  |                   |
| LIFR     |     | 5809-mir-128.txt  |
| line     | 583 |                   |
| LIFR     |     | 5810-mir-143.txt  |
| line     | 181 |                   |
| LIFR     |     | 5811-mir-144.txt  |
| line     | 311 |                   |
|          |     |                   |
| TNS1     |     | 5802-mir-9.txt    |
| line     | 647 |                   |
| TNS1     |     | 5804-miR-21.txt   |
| line     | 96  |                   |
|          |     |                   |
| AMOTL1   |     | 5802-mir-9.txt    |
| line     | 649 |                   |
| AMOTL1   |     | 5810-mir-143.txt  |
| line     | 97  |                   |
|          |     |                   |
| KIAA1549 |     | 5802-mir-9.txt    |
| line     | 652 |                   |
| KIAA1549 |     | 5809-mir-128.txt  |
| line     | 613 |                   |
|          |     |                   |
| ANKRD52  |     | 5802-mir-9.txt    |
| line     | 653 |                   |
| ANKRD52  |     | 5805-mir-22.txt   |
| line     | 238 |                   |
| ANKRD52  |     | 5811-mir-144.txt  |
| line     | 593 |                   |
|          |     |                   |
| ACCN2    |     | 5802-mir-9.txt    |
| line     | 654 |                   |
| ACCN2    |     | 5808-mir-125b.txt |
| line     | 290 |                   |
|          |     |                   |
| CLCN6    |     | 5802-mir-9.txt    |
| line     | 657 |                   |
| CLCN6    |     | 5809-mir-128.txt  |
| line     | 227 |                   |

|        |     |                   |
|--------|-----|-------------------|
| PNRC2  |     | 5802-mir-9.txt    |
| line   | 658 |                   |
| PNRC2  |     | 5803-mir-16.txt   |
| line   | 205 |                   |
| PNRC2  |     | 5809-mir-128.txt  |
| line   | 164 |                   |
| PTCH1  |     | 5802-mir-9.txt    |
| line   | 660 |                   |
| PTCH1  |     | 5803-mir-16.txt   |
| line   | 161 |                   |
| PTCH1  |     | 5809-mir-128.txt  |
| line   | 607 |                   |
| PTCH1  |     | 5811-mir-144.txt  |
| line   | 366 |                   |
| ARL4C  |     | 5802-mir-9.txt    |
| line   | 662 |                   |
| ARL4C  |     | 5811-mir-144.txt  |
| line   | 132 |                   |
| GRSF1  |     | 5802-mir-9.txt    |
| line   | 666 |                   |
| GRSF1  |     | 5808-mir-125b.txt |
| line   | 299 |                   |
| GRSF1  |     | 5811-mir-144.txt  |
| line   | 209 |                   |
| DNAJB1 |     | 5802-mir-9.txt    |
| line   | 668 |                   |
| DNAJB1 |     | 5812-mir-155.txt  |
| line   | 131 |                   |
| FAM63B |     | 5802-mir-9.txt    |
| line   | 669 |                   |
| FAM63B |     | 5804-miR-21.txt   |
| line   | 59  |                   |
| CTDSP2 |     | 5802-mir-9.txt    |
| line   | 671 |                   |
| CTDSP2 |     | 5809-mir-128.txt  |
| line   | 42  |                   |
| SLC1A1 |     | 5802-mir-9.txt    |

|          |                  |
|----------|------------------|
| line 676 |                  |
| SLC1A1   | 5811-mir-144.txt |
| line 562 |                  |
| FMR1     | 5802-mir-9.txt   |
| line 677 |                  |
| FMR1     | 5811-mir-144.txt |
| line 227 |                  |
| PLAG1    | 5802-mir-9.txt   |
| line 678 |                  |
| PLAG1    | 5803-mir-16.txt  |
| line 3   |                  |
| PLAG1    | 5809-mir-128.txt |
| line 433 |                  |
| PLAG1    | 5811-mir-144.txt |
| line 355 |                  |
| CNTFR    | 5802-mir-9.txt   |
| line 679 |                  |
| CNTFR    | 5804-mir-21.txt  |
| line 68  |                  |
| GABBR2   | 5802-mir-9.txt   |
| line 680 |                  |
| GABBR2   | 5805-mir-22.txt  |
| line 241 |                  |
| GABBR2   | 5809-mir-128.txt |
| line 457 |                  |
| GABBR2   | 5811-mir-144.txt |
| line 259 |                  |
| SHANK2   | 5802-mir-9.txt   |
| line 684 |                  |
| SHANK2   | 5811-mir-144.txt |
| line 286 |                  |
| SHANK2   | 5812-mir-155.txt |
| line 227 |                  |
| MGAT1    | 5802-mir-9.txt   |
| line 686 |                  |
| MGAT1    | 5809-mir-128.txt |
| line 697 |                  |

|          |                   |
|----------|-------------------|
| SMURF1   | 5802-mir-9.txt    |
| line 697 |                   |
| SMURF1   | 5803-mir-16.txt   |
| line 22  |                   |
| SMURF1   | 5808-mir-125b.txt |
| line 169 |                   |
| C7orf42  | 5802-mir-9.txt    |
| line 698 |                   |
| C7orf42  | 5809-mir-128.txt  |
| line 755 |                   |
| EPAS1    | 5802-mir-9.txt    |
| line 699 |                   |
| EPAS1    | 5812-mir-155.txt  |
| line 279 |                   |
| SH3BP4   | 5802-mir-9.txt    |
| line 700 |                   |
| SH3BP4   | 5808-mir-125b.txt |
| line 130 |                   |
| SMAD4    | 5802-mir-9.txt    |
| line 706 |                   |
| SMAD4    | 5805-mir-22.txt   |
| line 97  |                   |
| SMAD4    | 5808-mir-125b.txt |
| line 332 |                   |
| SMAD4    | 5811-mir-144.txt  |
| line 468 |                   |
| C9orf5   | 5802-mir-9.txt    |
| line 707 |                   |
| C9orf5   | 5803-mir-16.txt   |
| line 197 |                   |
| C9orf5   | 5812-mir-155.txt  |
| line 214 |                   |
| WSB1     | 5802-mir-9.txt    |
| line 708 |                   |
| WSB1     | 5803-mir-16.txt   |
| line 79  |                   |
| WSB1     | 5809-mir-128.txt  |
| line 425 |                   |

|          |                   |
|----------|-------------------|
| WSB1     | 5811-mir-144.txt  |
| line 431 |                   |
| KCTD10   | 5802-mir-9.txt    |
| line 709 |                   |
| KCTD10   | 5811-mir-144.txt  |
| line 395 |                   |
| AATK     | 5802-mir-9.txt    |
| line 710 |                   |
| AATK     | 5803-mir-16.txt   |
| line 186 |                   |
| RCOR1    | 5802-mir-9.txt    |
| line 711 |                   |
| RCOR1    | 5805-mir-22.txt   |
| line 93  |                   |
| RCOR1    | 5812-mir-155.txt  |
| line 72  |                   |
| SH3BGRL2 | 5802-mir-9.txt    |
| line 712 |                   |
| SH3BGRL2 | 5809-mir-128.txt  |
| line 116 |                   |
| SGK3     | 5802-mir-9.txt    |
| line 714 |                   |
| SGK3     | 5811-mir-144.txt  |
| line 65  |                   |
| SGK3     | 5812-mir-155.txt  |
| line 51  |                   |
| GPATCH8  | 5802-mir-9.txt    |
| line 715 |                   |
| GPATCH8  | 5808-mir-125b.txt |
| line 194 |                   |
| FAM155B  | 5802-mir-9.txt    |
| line 716 |                   |
| FAM155B  | 5809-mir-128.txt  |
| line 445 |                   |
| SEMA6D   | 5802-mir-9.txt    |
| line 718 |                   |

|           |                  |
|-----------|------------------|
| SEMA6D    | 5803-mir-16.txt  |
| line 140  |                  |
| SEMA6D    | 5809-mir-128.txt |
| line 394  |                  |
| C2CD2     | 5802-mir-9.txt   |
| line 719  |                  |
| C2CD2     | 5809-mir-128.txt |
| line 208  |                  |
| C2CD2     | 5811-mir-144.txt |
| line 623  |                  |
| RAI14     | 5802-mir-9.txt   |
| line 721  |                  |
| RAI14     | 5809-mir-128.txt |
| line 674  |                  |
| TM9SF3    | 5802-mir-9.txt   |
| line 722  |                  |
| TM9SF3    | 5811-mir-144.txt |
| line 570  |                  |
| ABCA1     | 5802-mir-9.txt   |
| line 723  |                  |
| ABCA1     | 5809-mir-128.txt |
| line 139  |                  |
| ABCA1     | 5811-mir-144.txt |
| line 1    |                  |
| CREBZF    | 5802-mir-9.txt   |
| line 726  |                  |
| CREBZF    | 5810-mir-143.txt |
| line 115  |                  |
| SGCD      | 5802-mir-9.txt   |
| line 727  |                  |
| SGCD      | 5809-mir-128.txt |
| line 296  |                  |
| MAP3K7IP3 | 5802-mir-9.txt   |
| line 728  |                  |
| MAP3K7IP3 | 5803-mir-16.txt  |
| line 109  |                  |
| MAP3K7IP3 | 5809-mir-128.txt |

|         |     |                  |
|---------|-----|------------------|
| line    | 536 |                  |
| RFXDC2  |     | 5802-mir-9.txt   |
| line    | 729 |                  |
| RFXDC2  |     | 5806-mir-29b.txt |
| line    | 65  |                  |
| BNC2    |     | 5802-mir-9.txt   |
| line    | 731 |                  |
| BNC2    |     | 5811-mir-144.txt |
| line    | 167 |                  |
| BNC2    |     | 5812-mir-155.txt |
| line    | 44  |                  |
| PITPNM2 |     | 5802-mir-9.txt   |
| line    | 732 |                  |
| PITPNM2 |     | 5809-mir-128.txt |
| line    | 683 |                  |
| KCNA1   |     | 5802-mir-9.txt   |
| line    | 736 |                  |
| KCNA1   |     | 5804-miR-21.txt  |
| line    | 97  |                  |
| KCNA1   |     | 5809-mir-128.txt |
| line    | 253 |                  |
| KCNA1   |     | 5811-mir-144.txt |
| line    | 489 |                  |
| KCNA1   |     | 5812-mir-155.txt |
| line    | 265 |                  |
| CA7     |     | 5802-mir-9.txt   |
| line    | 737 |                  |
| CA7     |     | 5809-mir-128.txt |
| line    | 417 |                  |
| HIPK2   |     | 5802-mir-9.txt   |
| line    | 738 |                  |
| HIPK2   |     | 5809-mir-128.txt |
| line    | 604 |                  |
| HIPK2   |     | 5810-mir-143.txt |
| line    | 4   |                  |
| HIPK2   |     | 5811-mir-144.txt |
| line    | 321 |                  |



|        |     |                  |
|--------|-----|------------------|
| GPAM   |     | 5802-mir-9.txt   |
| line   | 741 |                  |
| GPAM   |     | 5809-mir-128.txt |
| line   | 9   |                  |
| FRY    |     | 5802-mir-9.txt   |
| line   | 743 |                  |
| FRY    |     | 5803-mir-16.txt  |
| line   | 271 |                  |
| ISL1   |     | 5802-mir-9.txt   |
| line   | 744 |                  |
| ISL1   |     | 5809-mir-128.txt |
| line   | 108 |                  |
| ATP8A1 |     | 5802-mir-9.txt   |
| line   | 752 |                  |
| ATP8A1 |     | 5805-mir-22.txt  |
| line   | 59  |                  |
| ATP8A1 |     | 5809-mir-128.txt |
| line   | 51  |                  |
| ATP8A1 |     | 5811-mir-144.txt |
| line   | 563 |                  |
| EIF5   |     | 5802-mir-9.txt   |
| line   | 753 |                  |
| EIF5   |     | 5809-mir-128.txt |
| line   | 399 |                  |
| EIF5   |     | 5811-mir-144.txt |
| line   | 284 |                  |
| UBR5   |     | 5802-mir-9.txt   |
| line   | 756 |                  |
| UBR5   |     | 5809-mir-128.txt |
| line   | 67  |                  |
| RXRA   |     | 5802-mir-9.txt   |
| line   | 757 |                  |
| RXRA   |     | 5809-mir-128.txt |
| line   | 700 |                  |
| ZFHx4  |     | 5802-mir-9.txt   |
| line   | 759 |                  |
| ZFHx4  |     | 5809-mir-128.txt |

|          |                   |
|----------|-------------------|
| line 648 |                   |
| ZFHx4    | 5811-mir-144.txt  |
| line 87  |                   |
| CPEB1    | 5802-mir-9.txt    |
| line 761 |                   |
| CPEB1    | 5805-mir-22.txt   |
| line 95  |                   |
| CPEB1    | 5811-mir-144.txt  |
| line 571 |                   |
| STX1A    | 5802-mir-9.txt    |
| line 765 |                   |
| STX1A    | 5809-mir-128.txt  |
| line 753 |                   |
| ELAVL2   | 5802-mir-9.txt    |
| line 766 |                   |
| ELAVL2   | 5811-mir-144.txt  |
| line 270 |                   |
| ALG9     | 5802-mir-9.txt    |
| line 767 |                   |
| ALG9     | 5805-mir-22.txt   |
| line 13  |                   |
| ALG9     | 5809-mir-128.txt  |
| line 43  |                   |
| KIAA0247 | 5802-mir-9.txt    |
| line 768 |                   |
| KIAA0247 | 5808-mir-125b.txt |
| line 379 |                   |
| IKZF4    | 5802-mir-9.txt    |
| line 776 |                   |
| IKZF4    | 5805-mir-22.txt   |
| line 12  |                   |
| IKZF4    | 5808-mir-125b.txt |
| line 141 |                   |
| IKZF4    | 5811-mir-144.txt  |
| line 287 |                   |
| TFRC     | 5802-mir-9.txt    |
| line 777 |                   |

|          |     |                   |
|----------|-----|-------------------|
| TFRC     |     | 5811-mir-144.txt  |
| line     | 530 |                   |
| TEAD1    |     | 5802-mir-9.txt    |
| line     | 778 |                   |
| TEAD1    |     | 5803-mir-16.txt   |
| line     | 263 |                   |
| TEAD1    |     | 5809-mir-128.txt  |
| line     | 89  |                   |
| RNF38    |     | 5802-mir-9.txt    |
| line     | 780 |                   |
| RNF38    |     | 5809-mir-128.txt  |
| line     | 180 |                   |
| RNF38    |     | 5811-mir-144.txt  |
| line     | 558 |                   |
| FNDC3B   |     | 5802-mir-9.txt    |
| line     | 782 |                   |
| FNDC3B   |     | 5808-mir-125b.txt |
| line     | 275 |                   |
| FNDC3B   |     | 5810-mir-143.txt  |
| line     | 192 |                   |
| C17orf85 |     | 5802-mir-9.txt    |
| line     | 785 |                   |
| C17orf85 |     | 5809-mir-128.txt  |
| line     | 293 |                   |
| DICER1   |     | 5802-mir-9.txt    |
| line     | 788 |                   |
| DICER1   |     | 5803-mir-16.txt   |
| line     | 174 |                   |
| DICER1   |     | 5808-mir-125b.txt |
| line     | 276 |                   |
| DICER1   |     | 5811-mir-144.txt  |
| line     | 325 |                   |
| USP31    |     | 5802-mir-9.txt    |
| line     | 789 |                   |
| USP31    |     | 5803-mir-16.txt   |
| line     | 162 |                   |
| USP31    |     | 5811-mir-144.txt  |
| line     | 269 |                   |

|          |                   |
|----------|-------------------|
| USP31    | 5812-mir-155.txt  |
| line 184 |                   |
| USP31    | 5813-mir-200c.txt |
| line 12  |                   |
| ATP11C   | 5802-mir-9.txt    |
| line 790 |                   |
| ATP11C   | 5810-mir-143.txt  |
| line 34  |                   |
| DCBLD2   | 5802-mir-9.txt    |
| line 794 |                   |
| DCBLD2   | 5809-mir-128.txt  |
| line 733 |                   |
| DCBLD2   | 5811-mir-144.txt  |
| line 105 |                   |
| RERE     | 5802-mir-9.txt    |
| line 798 |                   |
| RERE     | 5806-mir-29b.txt  |
| line 99  |                   |
| RERE     | 5809-mir-128.txt  |
| line 543 |                   |
| ZNF618   | 5802-mir-9.txt    |
| line 802 |                   |
| ZNF618   | 5805-mir-22.txt   |
| line 104 |                   |
| ZNF618   | 5808-mir-125b.txt |
| line 408 |                   |
| ZNF618   | 5809-mir-128.txt  |
| line 250 |                   |
| ZNF618   | 5810-mir-143.txt  |
| line 159 |                   |
| ZNF618   | 5811-mir-144.txt  |
| line 376 |                   |
| ZNF618   | 5812-mir-155.txt  |
| line 106 |                   |
| NE01     | 5802-mir-9.txt    |
| line 806 |                   |
| NE01     | 5808-mir-125b.txt |
| line 277 |                   |
| NE01     | 5809-mir-128.txt  |

|             |     |                  |
|-------------|-----|------------------|
| line        | 211 |                  |
| RAP1B       |     | 5802-mir-9.txt   |
| line        | 809 |                  |
| RAP1B       |     | 5809-mir-128.txt |
| line        | 220 |                  |
| RAP1B       |     | 5812-mir-155.txt |
| line        | 237 |                  |
| hCG_1757335 |     | 5802-mir-9.txt   |
| line        | 810 |                  |
| hCG_1757335 |     | 5809-mir-128.txt |
| line        | 173 |                  |
| hCG_1757335 |     | 5812-mir-155.txt |
| line        | 230 |                  |
| FOXO1       |     | 5802-mir-9.txt   |
| line        | 815 |                  |
| FOXO1       |     | 5809-mir-128.txt |
| line        | 198 |                  |
| FOXO1       |     | 5811-mir-144.txt |
| line        | 447 |                  |
| SERBP1      |     | 5802-mir-9.txt   |
| line        | 816 |                  |
| SERBP1      |     | 5803-mir-16.txt  |
| line        | 151 |                  |
| SERBP1      |     | 5809-mir-128.txt |
| line        | 731 |                  |
| tcag7.1228  |     | 5802-mir-9.txt   |
| line        | 818 |                  |
| tcag7.1228  |     | 5803-mir-16.txt  |
| line        | 6   |                  |
| tcag7.1228  |     | 5804-miR-21.txt  |
| line        | 32  |                  |
| tcag7.1228  |     | 5809-mir-128.txt |
| line        | 266 |                  |
| tcag7.1228  |     | 5811-mir-144.txt |
| line        | 21  |                  |
| LIN7C       |     | 5802-mir-9.txt   |
| line        | 819 |                  |
| LIN7C       |     | 5805-mir-22.txt  |

|           |                   |
|-----------|-------------------|
| line 27   |                   |
| LIN7C     | 5809-mir-128.txt  |
| line 430  |                   |
| SFRS12IP1 | 5802-mir-9.txt    |
| line 821  |                   |
| SFRS12IP1 | 5808-mir-125b.txt |
| line 285  |                   |
| DCTN1     | 5802-mir-9.txt    |
| line 822  |                   |
| DCTN1     | 5808-mir-125b.txt |
| line 363  |                   |
| KSR1      | 5802-mir-9.txt    |
| line 823  |                   |
| KSR1      | 5812-mir-155.txt  |
| line 160  |                   |
| PHF13     | 5802-mir-9.txt    |
| line 824  |                   |
| PHF13     | 5805-mir-22.txt   |
| line 259  |                   |
| CBX7      | 5802-mir-9.txt    |
| line 825  |                   |
| CBX7      | 5808-mir-125b.txt |
| line 307  |                   |
| FBX033    | 5802-mir-9.txt    |
| line 827  |                   |
| FBX033    | 5809-mir-128.txt  |
| line 133  |                   |
| FBX033    | 5812-mir-155.txt  |
| line 67   |                   |
| UBR1      | 5802-mir-9.txt    |
| line 828  |                   |
| UBR1      | 5809-mir-128.txt  |
| line 84   |                   |
| FOX03     | 5802-mir-9.txt    |
| line 829  |                   |
| FOX03     | 5806-mir-29b.txt  |

line 92

PTGFRN 5802-mir-9.txt

line 830

PTGFRN 5809-mir-128.txt

line 494

PTGFRN 5811-mir-144.txt

line 348

DDX3X 5802-mir-9.txt

line 831

DDX3X 5803-mir-16.txt

line 80

NFASC 5802-mir-9.txt

line 832

NFASC 5812-mir-155.txt

line 242

PHF15 5802-mir-9.txt

line 833

PHF15 5808-mir-125b.txt

line 98

PHF15 5809-mir-128.txt

line 773

PSCD3 5802-mir-9.txt

line 834

PSCD3 5805-mir-22.txt

line 30

PSCD3 5811-mir-144.txt

line 250

ZNF236 5802-mir-9.txt

line 836

ZNF236 5812-mir-155.txt

line 62

JHDM1D 5802-mir-9.txt

line 837

JHDM1D 5809-mir-128.txt

line 32

JHDM1D 5811-mir-144.txt

line 158

|        |     |                   |
|--------|-----|-------------------|
| JHDM1D |     | 5812-mir-155.txt  |
| line   | 79  |                   |
| RIMS3  |     | 5802-mir-9.txt    |
| line   | 838 |                   |
| RIMS3  |     | 5803-mir-16.txt   |
| line   | 231 |                   |
| RCAN2  |     | 5802-mir-9.txt    |
| line   | 846 |                   |
| RCAN2  |     | 5809-mir-128.txt  |
| line   | 77  |                   |
| MYO10  |     | 5802-mir-9.txt    |
| line   | 847 |                   |
| MYO10  |     | 5812-mir-155.txt  |
| line   | 133 |                   |
| NFIB   |     | 5802-mir-9.txt    |
| line   | 848 |                   |
| NFIB   |     | 5804-mir-21.txt   |
| line   | 24  |                   |
| NFIB   |     | 5805-mir-22.txt   |
| line   | 304 |                   |
| NFIB   |     | 5806-mir-29b.txt  |
| line   | 119 |                   |
| NFIB   |     | 5809-mir-128.txt  |
| line   | 729 |                   |
| CBX6   |     | 5802-mir-9.txt    |
| line   | 850 |                   |
| CBX6   |     | 5805-mir-22.txt   |
| line   | 247 |                   |
| CBX6   |     | 5806-mir-29b.txt  |
| line   | 93  |                   |
| RAB5B  |     | 5802-mir-9.txt    |
| line   | 851 |                   |
| RAB5B  |     | 5805-mir-22.txt   |
| line   | 60  |                   |
| DCP1A  |     | 5802-mir-9.txt    |
| line   | 852 |                   |
| DCP1A  |     | 5808-mir-125b.txt |



|          |                   |
|----------|-------------------|
| line 371 |                   |
| DCP1A    | 5809-mir-128.txt  |
| line 124 |                   |
| CSNK1G2  | 5802-mir-9.txt    |
| line 858 |                   |
| CSNK1G2  | 5812-mir-155.txt  |
| line 125 |                   |
| TSPAN9   | 5802-mir-9.txt    |
| line 860 |                   |
| TSPAN9   | 5803-mir-16.txt   |
| line 287 |                   |
| IGF2R    | 5802-mir-9.txt    |
| line 861 |                   |
| IGF2R    | 5811-mir-144.txt  |
| line 359 |                   |
| SRF      | 5802-mir-9.txt    |
| line 862 |                   |
| SRF      | 5805-mir-22.txt   |
| line 323 |                   |
| SRF      | 5808-mir-125b.txt |
| line 357 |                   |
| SRF      | 5811-mir-144.txt  |
| line 631 |                   |
| ZFHX3    | 5802-mir-9.txt    |
| line 863 |                   |
| ZFHX3    | 5809-mir-128.txt  |
| line 226 |                   |
| ZFHX3    | 5811-mir-144.txt  |
| line 567 |                   |
| ACVR1B   | 5802-mir-9.txt    |
| line 864 |                   |
| ACVR1B   | 5805-mir-22.txt   |
| line 282 |                   |
| MTPN     | 5802-mir-9.txt    |
| line 868 |                   |
| MTPN     | 5811-mir-144.txt  |
| line 340 |                   |

|          |                  |
|----------|------------------|
| OTUD4    | 5802-mir-9.txt   |
| line 869 |                  |
| OTUD4    | 5803-mir-16.txt  |
| line 183 |                  |
| OTUD4    | 5810-mir-143.txt |
| line 86  |                  |
| KIAA0495 | 5802-mir-9.txt   |
| line 870 |                  |
| KIAA0495 | 5812-mir-155.txt |
| line 49  |                  |
| PHF21A   | 5802-mir-9.txt   |
| line 872 |                  |
| PHF21A   | 5803-mir-16.txt  |
| line 290 |                  |
| SMPD3    | 5802-mir-9.txt   |
| line 875 |                  |
| SMPD3    | 5809-mir-128.txt |
| line 521 |                  |
| SMPD3    | 5811-mir-144.txt |
| line 293 |                  |
| PGAP1    | 5802-mir-9.txt   |
| line 879 |                  |
| PGAP1    | 5809-mir-128.txt |
| line 308 |                  |
| MYO1D    | 5802-mir-9.txt   |
| line 880 |                  |
| MYO1D    | 5812-mir-155.txt |
| line 64  |                  |
| C11orf41 | 5802-mir-9.txt   |
| line 881 |                  |
| C11orf41 | 5806-mir-29b.txt |
| line 101 |                  |
| C11orf41 | 5809-mir-128.txt |
| line 279 |                  |
| C11orf41 | 5811-mir-144.txt |
| line 104 |                  |

|          |                  |
|----------|------------------|
| DOT1L    | 5802-mir-9.txt   |
| line 883 |                  |
| DOT1L    | 5809-mir-128.txt |
| line 235 |                  |
| ZNF362   | 5802-mir-9.txt   |
| line 884 |                  |
| ZNF362   | 5811-mir-144.txt |
| line 474 |                  |
| SH3PXD2A | 5802-mir-9.txt   |
| line 885 |                  |
| SH3PXD2A | 5805-mir-22.txt  |
| line 287 |                  |
| SH3PXD2A | 5806-mir-29b.txt |
| line 19  |                  |
| SH3PXD2A | 5810-mir-143.txt |
| line 254 |                  |
| SH3PXD2A | 5811-mir-144.txt |
| line 646 |                  |
| SH3PXD2A | 5812-mir-155.txt |
| line 272 |                  |
| SELI     | 5802-mir-9.txt   |
| line 886 |                  |
| SELI     | 5810-mir-143.txt |
| line 75  |                  |
| SELI     | 5811-mir-144.txt |
| line 417 |                  |
| HRBL     | 5802-mir-9.txt   |
| line 888 |                  |
| HRBL     | 5809-mir-128.txt |
| line 783 |                  |
| BTG2     | 5802-mir-9.txt   |
| line 893 |                  |
| BTG2     | 5803-mir-16.txt  |
| line 177 |                  |
| BTG2     | 5809-mir-128.txt |
| line 476 |                  |
| TSC1     | 5802-mir-9.txt   |
| line 894 |                  |

|         |     |                  |
|---------|-----|------------------|
| TSC1    |     | 5809-mir-128.txt |
| line    | 362 |                  |
| XYLT1   |     | 5802-mir-9.txt   |
| line    | 895 |                  |
| XYLT1   |     | 5811-mir-144.txt |
| line    | 22  |                  |
| SYT14   |     | 5802-mir-9.txt   |
| line    | 901 |                  |
| SYT14   |     | 5811-mir-144.txt |
| line    | 613 |                  |
| SRC     |     | 5802-mir-9.txt   |
| line    | 902 |                  |
| SRC     |     | 5811-mir-144.txt |
| line    | 381 |                  |
| HDAC4   |     | 5802-mir-9.txt   |
| line    | 903 |                  |
| HDAC4   |     | 5805-mir-22.txt  |
| line    | 300 |                  |
| HDAC4   |     | 5806-mir-29b.txt |
| line    | 58  |                  |
| HDAC4   |     | 5809-mir-128.txt |
| line    | 647 |                  |
| KLF13   |     | 5802-mir-9.txt   |
| line    | 904 |                  |
| KLF13   |     | 5810-mir-143.txt |
| line    | 261 |                  |
| BTBD14B |     | 5802-mir-9.txt   |
| line    | 907 |                  |
| BTBD14B |     | 5811-mir-144.txt |
| line    | 516 |                  |
| MEX3A   |     | 5802-mir-9.txt   |
| line    | 909 |                  |
| MEX3A   |     | 5805-mir-22.txt  |
| line    | 273 |                  |
| RNF44   |     | 5802-mir-9.txt   |
| line    | 911 |                  |

|          |                  |
|----------|------------------|
| RNF44    | 5805-mir-22.txt  |
| line 188 |                  |
| RNF44    | 5811-mir-144.txt |
| line 618 |                  |
| BRPF3    | 5802-mir-9.txt   |
| line 912 |                  |
| BRPF3    | 5811-mir-144.txt |
| line 358 |                  |
| GTPBP1   | 5802-mir-9.txt   |
| line 914 |                  |
| GTPBP1   | 5803-mir-16.txt  |
| line 235 |                  |
| TNRC6B   | 5802-mir-9.txt   |
| line 915 |                  |
| TNRC6B   | 5803-mir-16.txt  |
| line 4   |                  |
| TNRC6B   | 5805-mir-22.txt  |
| line 182 |                  |
| TNRC6B   | 5806-mir-29b.txt |
| line 158 |                  |
| TNRC6B   | 5809-mir-128.txt |
| line 174 |                  |
| TNRC6B   | 5811-mir-144.txt |
| line 450 |                  |
| ARFIP2   | 5802-mir-9.txt   |
| line 917 |                  |
| ARFIP2   | 5805-mir-22.txt  |
| line 115 |                  |
| SNX30    | 5802-mir-9.txt   |
| line 919 |                  |
| SNX30    | 5805-mir-22.txt  |
| line 271 |                  |
| EPHB2    | 5802-mir-9.txt   |
| line 920 |                  |
| EPHB2    | 5809-mir-128.txt |
| line 223 |                  |
| LASP1    | 5802-mir-9.txt   |

|         |     |                  |
|---------|-----|------------------|
| line    | 921 |                  |
| LASP1   |     | 5809-mir-128.txt |
| line    | 387 |                  |
| LASP1   |     | 5810-mir-143.txt |
| line    | 247 |                  |
| IGF2BP1 |     | 5802-mir-9.txt   |
| line    | 923 |                  |
| IGF2BP1 |     | 5805-mir-22.txt  |
| line    | 257 |                  |
| EGR3    |     | 5802-mir-9.txt   |
| line    | 926 |                  |
| EGR3    |     | 5804-mir-21.txt  |
| line    | 83  |                  |
| EGR3    |     | 5809-mir-128.txt |
| line    | 141 |                  |
| MMP15   |     | 5802-mir-9.txt   |
| line    | 927 |                  |
| MMP15   |     | 5811-mir-144.txt |
| line    | 641 |                  |
| ZHX3    |     | 5802-mir-9.txt   |
| line    | 928 |                  |
| ZHX3    |     | 5803-mir-16.txt  |
| line    | 99  |                  |
| ZHX3    |     | 5806-mir-29b.txt |
| line    | 40  |                  |
| ZHX3    |     | 5810-mir-143.txt |
| line    | 163 |                  |
| PGRMC2  |     | 5802-mir-9.txt   |
| line    | 929 |                  |
| PGRMC2  |     | 5811-mir-144.txt |
| line    | 96  |                  |
| STXBP1  |     | 5802-mir-9.txt   |
| line    | 930 |                  |
| STXBP1  |     | 5810-mir-143.txt |
| line    | 105 |                  |
| VPS4B   |     | 5802-mir-9.txt   |
| line    | 932 |                  |

|        |     |                   |
|--------|-----|-------------------|
| VPS4B  |     | 5808-mir-125b.txt |
| line   | 11  |                   |
| VPS4B  |     | 5809-mir-128.txt  |
| line   | 355 |                   |
| VPS4B  |     | 5811-mir-144.txt  |
| line   | 276 |                   |
| ERC2   |     | 5802-mir-9.txt    |
| line   | 935 |                   |
| ERC2   |     | 5809-mir-128.txt  |
| line   | 187 |                   |
| MGAT4A |     | 5803-mir-16.txt   |
| line   | 5   |                   |
| MGAT4A |     | 5806-mir-29b.txt  |
| line   | 50  |                   |
| MGAT4A |     | 5808-mir-125b.txt |
| line   | 143 |                   |
| MGAT4A |     | 5811-mir-144.txt  |
| line   | 133 |                   |
| HELZ   |     | 5803-mir-16.txt   |
| line   | 18  |                   |
| HELZ   |     | 5811-mir-144.txt  |
| line   | 555 |                   |
| ACVR2B |     | 5803-mir-16.txt   |
| line   | 19  |                   |
| ACVR2B |     | 5811-mir-144.txt  |
| line   | 295 |                   |
| ACVR2B |     | 5812-mir-155.txt  |
| line   | 264 |                   |
| RSBN1  |     | 5803-mir-16.txt   |
| line   | 26  |                   |
| RSBN1  |     | 5805-mir-22.txt   |
| line   | 21  |                   |
| RSBN1  |     | 5809-mir-128.txt  |
| line   | 412 |                   |
| ASH1L  |     | 5803-mir-16.txt   |
| line   | 27  |                   |
| ASH1L  |     | 5810-mir-143.txt  |
| line   | 169 |                   |

|           |                   |
|-----------|-------------------|
| ASH1L     | 5811-mir-144.txt  |
| line 362  |                   |
| SLC12A2   | 5803-mir-16.txt   |
| line 28   |                   |
| SLC12A2   | 5811-mir-144.txt  |
| line 3    |                   |
| NUP50     | 5803-mir-16.txt   |
| line 36   |                   |
| NUP50     | 5808-mir-125b.txt |
| line 398  |                   |
| GABARAPL1 | 5803-mir-16.txt   |
| line 40   |                   |
| GABARAPL1 | 5810-mir-143.txt  |
| line 120  |                   |
| FAM73A    | 5803-mir-16.txt   |
| line 41   |                   |
| FAM73A    | 5808-mir-125b.txt |
| line 302  |                   |
| FAM73A    | 5811-mir-144.txt  |
| line 464  |                   |
| MOBK13    | 5803-mir-16.txt   |
| line 46   |                   |
| MOBK13    | 5811-mir-144.txt  |
| line 35   |                   |
| CD2AP     | 5803-mir-16.txt   |
| line 47   |                   |
| CD2AP     | 5809-mir-128.txt  |
| line 649  |                   |
| MAFK      | 5803-mir-16.txt   |
| line 51   |                   |
| MAFK      | 5811-mir-144.txt  |
| line 354  |                   |
| FLJ40142  | 5803-mir-16.txt   |
| line 53   |                   |
| FLJ40142  | 5811-mir-144.txt  |
| line 285  |                   |



|                |     |                  |
|----------------|-----|------------------|
| ZMYM2          |     | 5803-mir-16.txt  |
| line           | 58  |                  |
| ZMYM2          |     | 5811-mir-144.txt |
| line           | 505 |                  |
| ZMYM2          |     | 5812-mir-155.txt |
| line           | 206 |                  |
| SMAD5          |     | 5803-mir-16.txt  |
| line           | 62  |                  |
| SMAD5          |     | 5809-mir-128.txt |
| line           | 416 |                  |
| SMAD5          |     | 5811-mir-144.txt |
| line           | 426 |                  |
| MYLK           |     | 5803-mir-16.txt  |
| line           | 64  |                  |
| MYLK           |     | 5812-mir-155.txt |
| line           | 53  |                  |
| FBXW7          |     | 5803-mir-16.txt  |
| line           | 73  |                  |
| FBXW7          |     | 5805-mir-22.txt  |
| line           | 203 |                  |
| FBXW7          |     | 5809-mir-128.txt |
| line           | 287 |                  |
| FBXW7          |     | 5811-mir-144.txt |
| line           | 638 |                  |
| SOBP           |     | 5803-mir-16.txt  |
| line           | 81  |                  |
| SOBP           |     | 5810-mir-143.txt |
| line           | 81  |                  |
| SOBP           |     | 5811-mir-144.txt |
| line           | 339 |                  |
| TMEM189-UBE2V1 |     | 5803-mir-16.txt  |
| line           | 83  |                  |
| TMEM189-UBE2V1 |     | 5809-mir-128.txt |
| line           | 671 |                  |
| TMEM189-UBE2V1 |     | 5811-mir-144.txt |
| line           | 187 |                  |
| UBE2V1         |     | 5803-mir-16.txt  |

|          |                  |
|----------|------------------|
| line 84  |                  |
| UBE2V1   | 5809-mir-128.txt |
| line 672 |                  |
| UBE2V1   | 5811-mir-144.txt |
| line 188 |                  |
| NAPEPLD  | 5803-mir-16.txt  |
| line 87  |                  |
| NAPEPLD  | 5809-mir-128.txt |
| line 720 |                  |
| FAT3     | 5803-mir-16.txt  |
| line 88  |                  |
| FAT3     | 5811-mir-144.txt |
| line 12  |                  |
| ABI2     | 5803-mir-16.txt  |
| line 91  |                  |
| ABI2     | 5811-mir-144.txt |
| line 174 |                  |
| CCNT2    | 5803-mir-16.txt  |
| line 92  |                  |
| CCNT2    | 5811-mir-144.txt |
| line 8   |                  |
| TACC1    | 5803-mir-16.txt  |
| line 93  |                  |
| TACC1    | 5809-mir-128.txt |
| line 326 |                  |
| CYP26B1  | 5803-mir-16.txt  |
| line 100 |                  |
| CYP26B1  | 5807-mir-99a.txt |
| line 23  |                  |
| CYP26B1  | 5812-mir-155.txt |
| line 213 |                  |
| NARG1    | 5803-mir-16.txt  |
| line 101 |                  |
| NARG1    | 5809-mir-128.txt |
| line 334 |                  |
| HOXA10   | 5803-mir-16.txt  |

|          |                   |
|----------|-------------------|
| line 104 |                   |
| H0XA10   | 5809-mir-128.txt  |
| line 522 |                   |
| H0XA10   | 5811-mir-144.txt  |
| line 389 |                   |
| SMAD3    | 5803-mir-16.txt   |
| line 111 |                   |
| SMAD3    | 5810-mir-143.txt  |
| line 231 |                   |
| Y0D1     | 5803-mir-16.txt   |
| line 112 |                   |
| Y0D1     | 5808-mir-125b.txt |
| line 328 |                   |
| ZCCHC3   | 5803-mir-16.txt   |
| line 118 |                   |
| ZCCHC3   | 5804-miR-21.txt   |
| line 84  |                   |
| BDNF     | 5803-mir-16.txt   |
| line 121 |                   |
| BDNF     | 5812-mir-155.txt  |
| line 191 |                   |
| B4GALT1  | 5803-mir-16.txt   |
| line 123 |                   |
| B4GALT1  | 5808-mir-125b.txt |
| line 351 |                   |
| WDR82    | 5803-mir-16.txt   |
| line 130 |                   |
| WDR82    | 5805-mir-22.txt   |
| line 78  |                   |
| CCND1    | 5803-mir-16.txt   |
| line 132 |                   |
| CCND1    | 5812-mir-155.txt  |
| line 261 |                   |
| SVEP1    | 5803-mir-16.txt   |
| line 133 |                   |
| SVEP1    | 5810-mir-143.txt  |

|         |     |                   |
|---------|-----|-------------------|
| line    | 193 |                   |
| ATP13A3 |     | 5803-mir-16.txt   |
| line    | 135 |                   |
| ATP13A3 |     | 5808-mir-125b.txt |
| line    | 274 |                   |
| LRP1B   |     | 5803-mir-16.txt   |
| line    | 138 |                   |
| LRP1B   |     | 5812-mir-155.txt  |
| line    | 21  |                   |
| C1orf9  |     | 5803-mir-16.txt   |
| line    | 139 |                   |
| C1orf9  |     | 5809-mir-128.txt  |
| line    | 484 |                   |
| RCOR3   |     | 5803-mir-16.txt   |
| line    | 141 |                   |
| RCOR3   |     | 5809-mir-128.txt  |
| line    | 7   |                   |
| BAG5    |     | 5803-mir-16.txt   |
| line    | 146 |                   |
| BAG5    |     | 5812-mir-155.txt  |
| line    | 37  |                   |
| ZNF654  |     | 5803-mir-16.txt   |
| line    | 148 |                   |
| ZNF654  |     | 5811-mir-144.txt  |
| line    | 70  |                   |
| ZCCHC2  |     | 5803-mir-16.txt   |
| line    | 149 |                   |
| ZCCHC2  |     | 5811-mir-144.txt  |
| line    | 155 |                   |
| IRF4    |     | 5803-mir-16.txt   |
| line    | 152 |                   |
| IRF4    |     | 5809-mir-128.txt  |
| line    | 10  |                   |
| GRAMD3  |     | 5803-mir-16.txt   |
| line    | 153 |                   |

|          |                  |
|----------|------------------|
| GRAMD3   | 5804-miR-21.txt  |
| line 26  |                  |
| RICTOR   | 5803-mir-16.txt  |
| line 154 |                  |
| RICTOR   | 5809-mir-128.txt |
| line 739 |                  |
| RICTOR   | 5810-mir-143.txt |
| line 108 |                  |
| RICTOR   | 5812-mir-155.txt |
| line 23  |                  |
| JARID2   | 5803-mir-16.txt  |
| line 158 |                  |
| JARID2   | 5805-mir-22.txt  |
| line 290 |                  |
| JARID2   | 5812-mir-155.txt |
| line 4   |                  |
| EPB41L4B | 5803-mir-16.txt  |
| line 159 |                  |
| EPB41L4B | 5805-mir-22.txt  |
| line 166 |                  |
| AMOT     | 5803-mir-16.txt  |
| line 164 |                  |
| AMOT     | 5805-mir-22.txt  |
| line 208 |                  |
| PARD6B   | 5803-mir-16.txt  |
| line 165 |                  |
| PARD6B   | 5809-mir-128.txt |
| line 520 |                  |
| GALNT1   | 5803-mir-16.txt  |
| line 169 |                  |
| GALNT1   | 5811-mir-144.txt |
| line 407 |                  |
| C20orf39 | 5803-mir-16.txt  |
| line 171 |                  |
| C20orf39 | 5809-mir-128.txt |
| line 547 |                  |

|          |                   |
|----------|-------------------|
| CBFA2T3  | 5803-mir-16.txt   |
| line 173 |                   |
| CBFA2T3  | 5809-mir-128.txt  |
| line 696 |                   |
| ACSL4    | 5803-mir-16.txt   |
| line 178 |                   |
| ACSL4    | 5811-mir-144.txt  |
| line 265 |                   |
| YWHAQ    | 5803-mir-16.txt   |
| line 179 |                   |
| YWHAQ    | 5813-mir-200c.txt |
| line 23  |                   |
| ARRDC4   | 5803-mir-16.txt   |
| line 180 |                   |
| ARRDC4   | 5806-mir-29b.txt  |
| line 153 |                   |
| ARRDC4   | 5809-mir-128.txt  |
| line 27  |                   |
| PHC3     | 5803-mir-16.txt   |
| line 181 |                   |
| PHC3     | 5812-mir-155.txt  |
| line 14  |                   |
| EVI5     | 5803-mir-16.txt   |
| line 185 |                   |
| EVI5     | 5809-mir-128.txt  |
| line 568 |                   |
| COPS2    | 5803-mir-16.txt   |
| line 191 |                   |
| COPS2    | 5811-mir-144.txt  |
| line 522 |                   |
| FRYL     | 5803-mir-16.txt   |
| line 192 |                   |
| FRYL     | 5809-mir-128.txt  |
| line 121 |                   |
| LPHN2    | 5803-mir-16.txt   |
| line 193 |                   |

|          |     |                  |
|----------|-----|------------------|
| LPHN2    |     | 5811-mir-144.txt |
| line     | 590 |                  |
| NAV1     |     | 5803-mir-16.txt  |
| line     | 194 |                  |
| NAV1     |     | 5806-mir-29b.txt |
| line     | 29  |                  |
| KIAA1333 |     | 5803-mir-16.txt  |
| line     | 195 |                  |
| KIAA1333 |     | 5812-mir-155.txt |
| line     | 10  |                  |
| ZNF367   |     | 5803-mir-16.txt  |
| line     | 204 |                  |
| ZNF367   |     | 5804-miR-21.txt  |
| line     | 53  |                  |
| KPNA3    |     | 5803-mir-16.txt  |
| line     | 216 |                  |
| KPNA3    |     | 5811-mir-144.txt |
| line     | 518 |                  |
| PHLPPL   |     | 5803-mir-16.txt  |
| line     | 217 |                  |
| PHLPPL   |     | 5809-mir-128.txt |
| line     | 307 |                  |
| FREQ     |     | 5803-mir-16.txt  |
| line     | 227 |                  |
| FREQ     |     | 5809-mir-128.txt |
| line     | 276 |                  |
| FREQ     |     | 5811-mir-144.txt |
| line     | 550 |                  |
| PRPF38A  |     | 5803-mir-16.txt  |
| line     | 228 |                  |
| PRPF38A  |     | 5805-mir-22.txt  |
| line     | 35  |                  |
| CHD7     |     | 5803-mir-16.txt  |
| line     | 229 |                  |
| CHD7     |     | 5805-mir-22.txt  |
| line     | 190 |                  |

|         |     |                   |
|---------|-----|-------------------|
| CHD7    |     | 5812-mir-155.txt  |
| line    | 246 |                   |
| PELI2   |     | 5803-mir-16.txt   |
| line    | 230 |                   |
| PELI2   |     | 5808-mir-125b.txt |
| line    | 289 |                   |
| PELI2   |     | 5809-mir-128.txt  |
| line    | 548 |                   |
| SRP72   |     | 5803-mir-16.txt   |
| line    | 232 |                   |
| SRP72   |     | 5809-mir-128.txt  |
| line    | 268 |                   |
| CTDSPL  |     | 5803-mir-16.txt   |
| line    | 234 |                   |
| CTDSPL  |     | 5809-mir-128.txt  |
| line    | 769 |                   |
| FRS2    |     | 5803-mir-16.txt   |
| line    | 238 |                   |
| FRS2    |     | 5810-mir-143.txt  |
| line    | 82  |                   |
| FRS2    |     | 5811-mir-144.txt  |
| line    | 54  |                   |
| NUP210  |     | 5803-mir-16.txt   |
| line    | 239 |                   |
| NUP210  |     | 5808-mir-125b.txt |
| line    | 15  |                   |
| NUP210  |     | 5809-mir-128.txt  |
| line    | 552 |                   |
| BACH2   |     | 5803-mir-16.txt   |
| line    | 241 |                   |
| BACH2   |     | 5811-mir-144.txt  |
| line    | 47  |                   |
| PLEKHH1 |     | 5803-mir-16.txt   |
| line    | 242 |                   |
| PLEKHH1 |     | 5809-mir-128.txt  |
| line    | 734 |                   |



|        |     |                  |
|--------|-----|------------------|
| HPCAL4 |     | 5803-mir-16.txt  |
| line   | 244 |                  |
| HPCAL4 |     | 5806-mir-29b.txt |
| line   | 41  |                  |
| PIM1   |     | 5803-mir-16.txt  |
| line   | 245 |                  |
| PIM1   |     | 5811-mir-144.txt |
| line   | 214 |                  |
| CDV3   |     | 5803-mir-16.txt  |
| line   | 247 |                  |
| CDV3   |     | 5811-mir-144.txt |
| line   | 149 |                  |
| ESRRG  |     | 5803-mir-16.txt  |
| line   | 248 |                  |
| ESRRG  |     | 5810-mir-143.txt |
| line   | 222 |                  |
| ESRRG  |     | 5811-mir-144.txt |
| line   | 332 |                  |
| MMD    |     | 5803-mir-16.txt  |
| line   | 249 |                  |
| MMD    |     | 5809-mir-128.txt |
| line   | 413 |                  |
| ABTB2  |     | 5803-mir-16.txt  |
| line   | 251 |                  |
| ABTB2  |     | 5811-mir-144.txt |
| line   | 461 |                  |
| PURB   |     | 5803-mir-16.txt  |
| line   | 252 |                  |
| PURB   |     | 5804-mir-21.txt  |
| line   | 76  |                  |
| PURB   |     | 5805-mir-22.txt  |
| line   | 142 |                  |
| PURB   |     | 5811-mir-144.txt |
| line   | 473 |                  |
| KIF3B  |     | 5803-mir-16.txt  |
| line   | 256 |                  |
| KIF3B  |     | 5810-mir-143.txt |

|          |     |                   |
|----------|-----|-------------------|
| line     | 47  |                   |
| DLL4     |     | 5803-mir-16.txt   |
| line     | 257 |                   |
| DLL4     |     | 5809-mir-128.txt  |
| line     | 602 |                   |
| FOXK1    |     | 5803-mir-16.txt   |
| line     | 260 |                   |
| FOXK1    |     | 5812-mir-155.txt  |
| line     | 280 |                   |
| ADAMTS18 |     | 5803-mir-16.txt   |
| line     | 261 |                   |
| ADAMTS18 |     | 5806-mir-29b.txt  |
| line     | 53  |                   |
| MAP3K7   |     | 5803-mir-16.txt   |
| line     | 264 |                   |
| MAP3K7   |     | 5810-mir-143.txt  |
| line     | 62  |                   |
| MED1     |     | 5803-mir-16.txt   |
| line     | 267 |                   |
| MED1     |     | 5809-mir-128.txt  |
| line     | 749 |                   |
| CAB39    |     | 5803-mir-16.txt   |
| line     | 277 |                   |
| CAB39    |     | 5812-mir-155.txt  |
| line     | 154 |                   |
| ZC3H12B  |     | 5803-mir-16.txt   |
| line     | 278 |                   |
| ZC3H12B  |     | 5809-mir-128.txt  |
| line     | 747 |                   |
| TET3     |     | 5803-mir-16.txt   |
| line     | 286 |                   |
| TET3     |     | 5808-mir-125b.txt |
| line     | 333 |                   |
| TET3     |     | 5811-mir-144.txt  |
| line     | 628 |                   |

|         |     |                  |
|---------|-----|------------------|
| GATAD2B |     | 5804-miR-21.txt  |
| line    | 1   |                  |
| GATAD2B |     | 5812-mir-155.txt |
| line    | 273 |                  |
| SCML2   |     | 5804-miR-21.txt  |
| line    | 3   |                  |
| SCML2   |     | 5806-mir-29b.txt |
| line    | 24  |                  |
| SATB1   |     | 5804-miR-21.txt  |
| line    | 4   |                  |
| SATB1   |     | 5812-mir-155.txt |
| line    | 168 |                  |
| TIAM1   |     | 5804-miR-21.txt  |
| line    | 5   |                  |
| TIAM1   |     | 5805-mir-22.txt  |
| line    | 206 |                  |
| TIAM1   |     | 5806-mir-29b.txt |
| line    | 107 |                  |
| THRB    |     | 5804-miR-21.txt  |
| line    | 10  |                  |
| THRB    |     | 5809-mir-128.txt |
| line    | 585 |                  |
| FGF1    |     | 5804-miR-21.txt  |
| line    | 20  |                  |
| FGF1    |     | 5810-mir-143.txt |
| line    | 123 |                  |
| TIMP3   |     | 5804-miR-21.txt  |
| line    | 23  |                  |
| TIMP3   |     | 5811-mir-144.txt |
| line    | 606 |                  |
| SRL     |     | 5804-miR-21.txt  |
| line    | 27  |                  |
| SRL     |     | 5809-mir-128.txt |
| line    | 612 |                  |
| JAG1    |     | 5804-miR-21.txt  |
| line    | 29  |                  |

|       |     |                  |
|-------|-----|------------------|
| JAG1  |     | 5809-mir-128.txt |
| line  | 275 |                  |
| LRP6  |     | 5804-miR-21.txt  |
| line  | 31  |                  |
| LRP6  |     | 5806-mir-29b.txt |
| line  | 16  |                  |
| LRP6  |     | 5809-mir-128.txt |
| line  | 530 |                  |
| MEIS1 |     | 5804-miR-21.txt  |
| line  | 36  |                  |
| MEIS1 |     | 5811-mir-144.txt |
| line  | 345 |                  |
| MEIS1 |     | 5812-mir-155.txt |
| line  | 128 |                  |
| TET1  |     | 5804-miR-21.txt  |
| line  | 43  |                  |
| TET1  |     | 5809-mir-128.txt |
| line  | 299 |                  |
| TET1  |     | 5810-mir-143.txt |
| line  | 56  |                  |
| ASPN  |     | 5804-miR-21.txt  |
| line  | 45  |                  |
| ASPN  |     | 5811-mir-144.txt |
| line  | 277 |                  |
| SPRY2 |     | 5804-miR-21.txt  |
| line  | 46  |                  |
| SPRY2 |     | 5809-mir-128.txt |
| line  | 593 |                  |
| PAG1  |     | 5804-miR-21.txt  |
| line  | 47  |                  |
| PAG1  |     | 5806-mir-29b.txt |
| line  | 46  |                  |
| PAG1  |     | 5811-mir-144.txt |
| line  | 231 |                  |
| EHD1  |     | 5804-miR-21.txt  |
| line  | 49  |                  |
| EHD1  |     | 5812-mir-155.txt |

|          |     |                  |
|----------|-----|------------------|
| line     | 249 |                  |
| PIK3R1   |     | 5804-miR-21.txt  |
| line     | 50  |                  |
| PIK3R1   |     | 5809-mir-128.txt |
| line     | 271 |                  |
| PIK3R1   |     | 5812-mir-155.txt |
| line     | 211 |                  |
| ARHGEF12 |     | 5804-miR-21.txt  |
| line     | 56  |                  |
| ARHGEF12 |     | 5805-mir-22.txt  |
| line     | 94  |                  |
| SOCS6    |     | 5804-miR-21.txt  |
| line     | 58  |                  |
| SOCS6    |     | 5809-mir-128.txt |
| line     | 60  |                  |
| SOCS6    |     | 5811-mir-144.txt |
| line     | 291 |                  |
| SOCS6    |     | 5812-mir-155.txt |
| line     | 225 |                  |
| SNTB2    |     | 5804-miR-21.txt  |
| line     | 61  |                  |
| SNTB2    |     | 5811-mir-144.txt |
| line     | 76  |                  |
| BOLL     |     | 5804-miR-21.txt  |
| line     | 62  |                  |
| BOLL     |     | 5805-mir-22.txt  |
| line     | 328 |                  |
| ATPAF1   |     | 5804-miR-21.txt  |
| line     | 63  |                  |
| ATPAF1   |     | 5809-mir-128.txt |
| line     | 698 |                  |
| CBX4     |     | 5804-miR-21.txt  |
| line     | 64  |                  |
| CBX4     |     | 5811-mir-144.txt |
| line     | 228 |                  |
| FBX011   |     | 5804-miR-21.txt  |

|        |     |                  |
|--------|-----|------------------|
| line   | 69  |                  |
| FBX011 |     | 5812-mir-155.txt |
| line   | 149 |                  |
| GLT8D3 |     | 5804-miR-21.txt  |
| line   | 72  |                  |
| GLT8D3 |     | 5809-mir-128.txt |
| line   | 40  |                  |
| GLT8D3 |     | 5810-mir-143.txt |
| line   | 8   |                  |
| ACVR2A |     | 5804-miR-21.txt  |
| line   | 78  |                  |
| ACVR2A |     | 5809-mir-128.txt |
| line   | 88  |                  |
| SOX7   |     | 5804-miR-21.txt  |
| line   | 79  |                  |
| SOX7   |     | 5809-mir-128.txt |
| line   | 181 |                  |
| STK40  |     | 5804-miR-21.txt  |
| line   | 81  |                  |
| STK40  |     | 5809-mir-128.txt |
| line   | 379 |                  |
| COL4A1 |     | 5804-miR-21.txt  |
| line   | 82  |                  |
| COL4A1 |     | 5806-mir-29b.txt |
| line   | 10  |                  |
| PI15   |     | 5804-miR-21.txt  |
| line   | 90  |                  |
| PI15   |     | 5806-mir-29b.txt |
| line   | 1   |                  |
| PI15   |     | 5807-mir-99a.txt |
| line   | 20  |                  |
| PRKCE  |     | 5804-miR-21.txt  |
| line   | 93  |                  |
| PRKCE  |     | 5810-mir-143.txt |
| line   | 127 |                  |
| PRKCE  |     | 5811-mir-144.txt |
| line   | 463 |                  |

|          |                   |
|----------|-------------------|
| ZBTB47   | 5804-miR-21.txt   |
| line 99  |                   |
| ZBTB47   | 5806-mir-29b.txt  |
| line 79  |                   |
| ZBTB47   | 5808-mir-125b.txt |
| line 393 |                   |
| DCUN1D3  | 5804-miR-21.txt   |
| line 101 |                   |
| DCUN1D3  | 5812-mir-155.txt  |
| line 247 |                   |
| DNAJC16  | 5804-miR-21.txt   |
| line 102 |                   |
| DNAJC16  | 5805-mir-22.txt   |
| line 154 |                   |
| ZADH2    | 5804-miR-21.txt   |
| line 104 |                   |
| ZADH2    | 5809-mir-128.txt  |
| line 656 |                   |
| FUT9     | 5805-mir-22.txt   |
| line 1   |                   |
| FUT9     | 5809-mir-128.txt  |
| line 390 |                   |
| FUT9     | 5812-mir-155.txt  |
| line 80  |                   |
| TET2     | 5805-mir-22.txt   |
| line 4   |                   |
| TET2     | 5809-mir-128.txt  |
| line 165 |                   |
| H3F3B    | 5805-mir-22.txt   |
| line 5   |                   |
| H3F3B    | 5809-mir-128.txt  |
| line 28  |                   |
| LAMC1    | 5805-mir-22.txt   |
| line 9   |                   |
| LAMC1    | 5806-mir-29b.txt  |
| line 89  |                   |

|           |                   |
|-----------|-------------------|
| GIGYF2    | 5805-mir-22.txt   |
| line 11   |                   |
| GIGYF2    | 5809-mir-128.txt  |
| line 113  |                   |
| GIGYF2    | 5810-mir-143.txt  |
| line 32   |                   |
| LOC440093 | 5805-mir-22.txt   |
| line 14   |                   |
| LOC440093 | 5809-mir-128.txt  |
| line 91   |                   |
| CLIC4     | 5805-mir-22.txt   |
| line 16   |                   |
| CLIC4     | 5809-mir-128.txt  |
| line 225  |                   |
| TP53INP1  | 5805-mir-22.txt   |
| line 19   |                   |
| TP53INP1  | 5808-mir-125b.txt |
| line 116  |                   |
| TP53INP1  | 5811-mir-144.txt  |
| line 527  |                   |
| TP53INP1  | 5812-mir-155.txt  |
| line 85   |                   |
| VEZF1     | 5805-mir-22.txt   |
| line 22   |                   |
| VEZF1     | 5813-mir-200c.txt |
| line 31   |                   |
| ERBB3     | 5805-mir-22.txt   |
| line 36   |                   |
| ERBB3     | 5810-mir-143.txt  |
| line 113  |                   |
| FAM125B   | 5805-mir-22.txt   |
| line 44   |                   |
| FAM125B   | 5809-mir-128.txt  |
| line 244  |                   |
| PTEN      | 5805-mir-22.txt   |
| line 47   |                   |



|          |     |                  |
|----------|-----|------------------|
| PTEN     |     | 5811-mir-144.txt |
| line     | 367 |                  |
| CSF1R    |     | 5805-mir-22.txt  |
| line     | 51  |                  |
| CSF1R    |     | 5812-mir-155.txt |
| line     | 136 |                  |
| CHD9     |     | 5805-mir-22.txt  |
| line     | 52  |                  |
| CHD9     |     | 5812-mir-155.txt |
| line     | 68  |                  |
| KIAA1486 |     | 5805-mir-22.txt  |
| line     | 53  |                  |
| KIAA1486 |     | 5811-mir-144.txt |
| line     | 38  |                  |
| MAGI2    |     | 5805-mir-22.txt  |
| line     | 54  |                  |
| MAGI2    |     | 5811-mir-144.txt |
| line     | 243 |                  |
| CAV3     |     | 5805-mir-22.txt  |
| line     | 69  |                  |
| CAV3     |     | 5811-mir-144.txt |
| line     | 565 |                  |
| C1orf21  |     | 5805-mir-22.txt  |
| line     | 72  |                  |
| C1orf21  |     | 5809-mir-128.txt |
| line     | 315 |                  |
| BCL9L    |     | 5805-mir-22.txt  |
| line     | 73  |                  |
| BCL9L    |     | 5806-mir-29b.txt |
| line     | 154 |                  |
| BCL9L    |     | 5811-mir-144.txt |
| line     | 612 |                  |
| PHACTR2  |     | 5805-mir-22.txt  |
| line     | 77  |                  |
| PHACTR2  |     | 5811-mir-144.txt |
| line     | 380 |                  |

|          |                   |
|----------|-------------------|
| PAIP2B   | 5805-mir-22.txt   |
| line 81  |                   |
| PAIP2B   | 5809-mir-128.txt  |
| line 679 |                   |
| PPP1R9A  | 5805-mir-22.txt   |
| line 84  |                   |
| PPP1R9A  | 5809-mir-128.txt  |
| line 636 |                   |
| YWHAZ    | 5805-mir-22.txt   |
| line 85  |                   |
| YWHAZ    | 5812-mir-155.txt  |
| line 148 |                   |
| COPS7B   | 5805-mir-22.txt   |
| line 86  |                   |
| COPS7B   | 5808-mir-125b.txt |
| line 301 |                   |
| SNAI1    | 5805-mir-22.txt   |
| line 92  |                   |
| SNAI1    | 5809-mir-128.txt  |
| line 711 |                   |
| RFXANK   | 5805-mir-22.txt   |
| line 99  |                   |
| RFXANK   | 5808-mir-125b.txt |
| line 68  |                   |
| SATB2    | 5805-mir-22.txt   |
| line 100 |                   |
| SATB2    | 5809-mir-128.txt  |
| line 514 |                   |
| LRRC1    | 5805-mir-22.txt   |
| line 101 |                   |
| LRRC1    | 5811-mir-144.txt  |
| line 398 |                   |
| MON2     | 5805-mir-22.txt   |
| line 110 |                   |
| MON2     | 5811-mir-144.txt  |

|          |     |                   |
|----------|-----|-------------------|
| line     | 553 |                   |
| MAPK14   |     | 5805-mir-22.txt   |
| line     | 112 |                   |
| MAPK14   |     | 5809-mir-128.txt  |
| line     | 193 |                   |
| STK39    |     | 5805-mir-22.txt   |
| line     | 114 |                   |
| STK39    |     | 5809-mir-128.txt  |
| line     | 471 |                   |
| TRIB2    |     | 5805-mir-22.txt   |
| line     | 118 |                   |
| TRIB2    |     | 5808-mir-125b.txt |
| line     | 239 |                   |
| FBX046   |     | 5805-mir-22.txt   |
| line     | 125 |                   |
| FBX046   |     | 5810-mir-143.txt  |
| line     | 221 |                   |
| EDA      |     | 5805-mir-22.txt   |
| line     | 127 |                   |
| EDA      |     | 5811-mir-144.txt  |
| line     | 275 |                   |
| BAT2D1   |     | 5805-mir-22.txt   |
| line     | 131 |                   |
| BAT2D1   |     | 5806-mir-29b.txt  |
| line     | 27  |                   |
| BAT2D1   |     | 5811-mir-144.txt  |
| line     | 569 |                   |
| C14orf83 |     | 5805-mir-22.txt   |
| line     | 141 |                   |
| C14orf83 |     | 5806-mir-29b.txt  |
| line     | 157 |                   |
| C14orf83 |     | 5808-mir-125b.txt |
| line     | 403 |                   |
| SV2A     |     | 5805-mir-22.txt   |
| line     | 146 |                   |
| SV2A     |     | 5809-mir-128.txt  |

|         |     |                   |
|---------|-----|-------------------|
| line    | 251 |                   |
| SLC6A1  |     | 5805-mir-22.txt   |
| line    | 147 |                   |
| SLC6A1  |     | 5809-mir-128.txt  |
| line    | 31  |                   |
| MEIS2   |     | 5805-mir-22.txt   |
| line    | 153 |                   |
| MEIS2   |     | 5809-mir-128.txt  |
| line    | 610 |                   |
| MEIS2   |     | 5811-mir-144.txt  |
| line    | 94  |                   |
| NUDT4   |     | 5805-mir-22.txt   |
| line    | 158 |                   |
| NUDT4   |     | 5812-mir-155.txt  |
| line    | 215 |                   |
| ZCCHC14 |     | 5805-mir-22.txt   |
| line    | 159 |                   |
| ZCCHC14 |     | 5811-mir-144.txt  |
| line    | 510 |                   |
| NECAP1  |     | 5805-mir-22.txt   |
| line    | 162 |                   |
| NECAP1  |     | 5810-mir-143.txt  |
| line    | 53  |                   |
| MECP2   |     | 5805-mir-22.txt   |
| line    | 164 |                   |
| MECP2   |     | 5812-mir-155.txt  |
| line    | 274 |                   |
| ZMYM4   |     | 5805-mir-22.txt   |
| line    | 165 |                   |
| ZMYM4   |     | 5809-mir-128.txt  |
| line    | 560 |                   |
| KSR2    |     | 5805-mir-22.txt   |
| line    | 167 |                   |
| KSR2    |     | 5808-mir-125b.txt |
| line    | 225 |                   |
| KSR2    |     | 5809-mir-128.txt  |

|         |     |                  |
|---------|-----|------------------|
| line    | 188 |                  |
| MAP2K4  |     | 5805-mir-22.txt  |
| line    | 171 |                  |
| MAP2K4  |     | 5809-mir-128.txt |
| line    | 56  |                  |
| PTPN9   |     | 5805-mir-22.txt  |
| line    | 176 |                  |
| PTPN9   |     | 5809-mir-128.txt |
| line    | 377 |                  |
| PTPN9   |     | 5811-mir-144.txt |
| line    | 122 |                  |
| EDC3    |     | 5805-mir-22.txt  |
| line    | 179 |                  |
| EDC3    |     | 5811-mir-144.txt |
| line    | 542 |                  |
| NXT2    |     | 5805-mir-22.txt  |
| line    | 180 |                  |
| NXT2    |     | 5809-mir-128.txt |
| line    | 134 |                  |
| PRDM16  |     | 5805-mir-22.txt  |
| line    | 181 |                  |
| PRDM16  |     | 5809-mir-128.txt |
| line    | 353 |                  |
| PRDM16  |     | 5811-mir-144.txt |
| line    | 185 |                  |
| SPTY2D1 |     | 5805-mir-22.txt  |
| line    | 183 |                  |
| SPTY2D1 |     | 5809-mir-128.txt |
| line    | 85  |                  |
| SPTY2D1 |     | 5812-mir-155.txt |
| line    | 198 |                  |
| TGFBR1  |     | 5805-mir-22.txt  |
| line    | 199 |                  |
| TGFBR1  |     | 5809-mir-128.txt |
| line    | 351 |                  |
| EPC1    |     | 5805-mir-22.txt  |

|          |                   |
|----------|-------------------|
| line 202 |                   |
| EPC1     | 5806-mir-29b.txt  |
| line 115 |                   |
| ADCY6    | 5805-mir-22.txt   |
| line 204 |                   |
| ADCY6    | 5809-mir-128.txt  |
| line 598 |                   |
| PPP1R16B | 5805-mir-22.txt   |
| line 209 |                   |
| PPP1R16B | 5811-mir-144.txt  |
| line 219 |                   |
| TRIM67   | 5805-mir-22.txt   |
| line 212 |                   |
| TRIM67   | 5809-mir-128.txt  |
| line 163 |                   |
| KIAA1274 | 5805-mir-22.txt   |
| line 213 |                   |
| KIAA1274 | 5812-mir-155.txt  |
| line 48  |                   |
| PLAGL2   | 5805-mir-22.txt   |
| line 215 |                   |
| PLAGL2   | 5808-mir-125b.txt |
| line 395 |                   |
| PLAGL2   | 5809-mir-128.txt  |
| line 313 |                   |
| PLAGL2   | 5810-mir-143.txt  |
| line 242 |                   |
| JMJD3    | 5805-mir-22.txt   |
| line 216 |                   |
| JMJD3    | 5811-mir-144.txt  |
| line 637 |                   |
| CUL3     | 5805-mir-22.txt   |
| line 219 |                   |
| CUL3     | 5811-mir-144.txt  |
| line 283 |                   |
| HNRNPA3  | 5805-mir-22.txt   |

|          |                   |
|----------|-------------------|
| line 224 |                   |
| HNRNPA3  | 5812-mir-155.txt  |
| line 36  |                   |
| GPR107   | 5805-mir-22.txt   |
| line 226 |                   |
| GPR107   | 5808-mir-125b.txt |
| line 120 |                   |
| SLC6A17  | 5805-mir-22.txt   |
| line 227 |                   |
| SLC6A17  | 5808-mir-125b.txt |
| line 195 |                   |
| SLC6A17  | 5811-mir-144.txt  |
| line 615 |                   |
| SCAMP1   | 5805-mir-22.txt   |
| line 231 |                   |
| SCAMP1   | 5811-mir-144.txt  |
| line 509 |                   |
| UBE2NL   | 5805-mir-22.txt   |
| line 235 |                   |
| UBE2NL   | 5809-mir-128.txt  |
| line 186 |                   |
| SAMD12   | 5805-mir-22.txt   |
| line 237 |                   |
| SAMD12   | 5809-mir-128.txt  |
| line 407 |                   |
| SAMD12   | 5811-mir-144.txt  |
| line 267 |                   |
| SAMD12   | 5812-mir-155.txt  |
| line 123 |                   |
| TTC9     | 5805-mir-22.txt   |
| line 242 |                   |
| TTC9     | 5809-mir-128.txt  |
| line 317 |                   |
| ITGB8    | 5805-mir-22.txt   |
| line 245 |                   |
| ITGB8    | 5810-mir-143.txt  |
| line 69  |                   |

|       |     |                  |
|-------|-----|------------------|
| ITGB8 |     | 5811-mir-144.txt |
| line  | 496 |                  |
| DDX6  |     | 5805-mir-22.txt  |
| line  | 251 |                  |
| DDX6  |     | 5809-mir-128.txt |
| line  | 504 |                  |
| DDX6  |     | 5810-mir-143.txt |
| line  | 232 |                  |
| NPNT  |     | 5805-mir-22.txt  |
| line  | 254 |                  |
| NPNT  |     | 5811-mir-144.txt |
| line  | 400 |                  |
| NCOA1 |     | 5805-mir-22.txt  |
| line  | 256 |                  |
| NCOA1 |     | 5809-mir-128.txt |
| line  | 653 |                  |
| UBE2N |     | 5805-mir-22.txt  |
| line  | 258 |                  |
| UBE2N |     | 5809-mir-128.txt |
| line  | 194 |                  |
| WSCD1 |     | 5805-mir-22.txt  |
| line  | 260 |                  |
| WSCD1 |     | 5810-mir-143.txt |
| line  | 206 |                  |
| ETV1  |     | 5805-mir-22.txt  |
| line  | 261 |                  |
| ETV1  |     | 5811-mir-144.txt |
| line  | 556 |                  |
| ETV1  |     | 5812-mir-155.txt |
| line  | 266 |                  |
| ERBB4 |     | 5805-mir-22.txt  |
| line  | 268 |                  |
| ERBB4 |     | 5811-mir-144.txt |
| line  | 89  |                  |
| NFAT5 |     | 5805-mir-22.txt  |
| line  | 272 |                  |



|         |     |                   |
|---------|-----|-------------------|
| NFAT5   |     | 5809-mir-128.txt  |
| line    | 630 |                   |
| NFAT5   |     | 5812-mir-155.txt  |
| line    | 254 |                   |
| WDFY3   |     | 5805-mir-22.txt   |
| line    | 277 |                   |
| WDFY3   |     | 5811-mir-144.txt  |
| line    | 310 |                   |
| USP46   |     | 5805-mir-22.txt   |
| line    | 278 |                   |
| USP46   |     | 5809-mir-128.txt  |
| line    | 622 |                   |
| USP46   |     | 5810-mir-143.txt  |
| line    | 184 |                   |
| BRSK2   |     | 5805-mir-22.txt   |
| line    | 285 |                   |
| BRSK2   |     | 5808-mir-125b.txt |
| line    | 405 |                   |
| BRSK2   |     | 5811-mir-144.txt  |
| line    | 639 |                   |
| SLC16A2 |     | 5805-mir-22.txt   |
| line    | 286 |                   |
| SLC16A2 |     | 5806-mir-29b.txt  |
| line    | 142 |                   |
| SLC16A2 |     | 5810-mir-143.txt  |
| line    | 65  |                   |
| ZNF609  |     | 5805-mir-22.txt   |
| line    | 293 |                   |
| ZNF609  |     | 5806-mir-29b.txt  |
| line    | 145 |                   |
| SNX18   |     | 5805-mir-22.txt   |
| line    | 295 |                   |
| SNX18   |     | 5809-mir-128.txt  |
| line    | 395 |                   |
| AKAP6   |     | 5805-mir-22.txt   |
| line    | 297 |                   |
| AKAP6   |     | 5810-mir-143.txt  |

|          |     |                   |
|----------|-----|-------------------|
| line     | 11  |                   |
| TUB      |     | 5805-mir-22.txt   |
| line     | 301 |                   |
| TUB      |     | 5809-mir-128.txt  |
| line     | 65  |                   |
| TUB      |     | 5810-mir-143.txt  |
| line     | 12  |                   |
| TLK2     |     | 5805-mir-22.txt   |
| line     | 303 |                   |
| TLK2     |     | 5808-mir-125b.txt |
| line     | 304 |                   |
| TLK2     |     | 5809-mir-128.txt  |
| line     | 470 |                   |
| TLK2     |     | 5810-mir-143.txt  |
| line     | 199 |                   |
| OLA1     |     | 5805-mir-22.txt   |
| line     | 306 |                   |
| OLA1     |     | 5811-mir-144.txt  |
| line     | 377 |                   |
| KCNC1    |     | 5805-mir-22.txt   |
| line     | 310 |                   |
| KCNC1    |     | 5810-mir-143.txt  |
| line     | 248 |                   |
| SP1      |     | 5805-mir-22.txt   |
| line     | 311 |                   |
| SP1      |     | 5806-mir-29b.txt  |
| line     | 134 |                   |
| SP1      |     | 5809-mir-128.txt  |
| line     | 202 |                   |
| SP1      |     | 5812-mir-155.txt  |
| line     | 24  |                   |
| KIAA0556 |     | 5805-mir-22.txt   |
| line     | 315 |                   |
| KIAA0556 |     | 5811-mir-144.txt  |
| line     | 647 |                   |
| OLFML2A  |     | 5805-mir-22.txt   |
| line     | 317 |                   |

|          |                   |
|----------|-------------------|
| OLFML2A  | 5808-mir-125b.txt |
| line 21  |                   |
| ZNF827   | 5805-mir-22.txt   |
| line 320 |                   |
| ZNF827   | 5809-mir-128.txt  |
| line 480 |                   |
| VASH1    | 5805-mir-22.txt   |
| line 325 |                   |
| VASH1    | 5810-mir-143.txt  |
| line 3   |                   |
| UBE2G1   | 5805-mir-22.txt   |
| line 329 |                   |
| UBE2G1   | 5808-mir-125b.txt |
| line 94  |                   |
| UBE2G1   | 5811-mir-144.txt  |
| line 210 |                   |
| HBP1     | 5806-mir-29b.txt  |
| line 3   |                   |
| HBP1     | 5812-mir-155.txt  |
| line 96  |                   |
| KIAA2022 | 5806-mir-29b.txt  |
| line 4   |                   |
| KIAA2022 | 5810-mir-143.txt  |
| line 110 |                   |
| ELN      | 5806-mir-29b.txt  |
| line 6   |                   |
| ELN      | 5811-mir-144.txt  |
| line 622 |                   |
| RIT1     | 5806-mir-29b.txt  |
| line 18  |                   |
| RIT1     | 5808-mir-125b.txt |
| line 35  |                   |
| SS18L1   | 5806-mir-29b.txt  |
| line 23  |                   |
| SS18L1   | 5809-mir-128.txt  |
| line 618 |                   |

|          |                  |
|----------|------------------|
| TXNDC4   | 5806-mir-29b.txt |
| line 35  |                  |
| TXNDC4   | 5809-mir-128.txt |
| line 398 |                  |
| ADAMTS17 | 5806-mir-29b.txt |
| line 37  |                  |
| ADAMTS17 | 5811-mir-144.txt |
| line 216 |                  |
| C5orf13  | 5806-mir-29b.txt |
| line 38  |                  |
| C5orf13  | 5809-mir-128.txt |
| line 129 |                  |
| MAFB     | 5806-mir-29b.txt |
| line 42  |                  |
| MAFB     | 5812-mir-155.txt |
| line 219 |                  |
| ZFP36L1  | 5806-mir-29b.txt |
| line 47  |                  |
| ZFP36L1  | 5809-mir-128.txt |
| line 183 |                  |
| JARID1B  | 5806-mir-29b.txt |
| line 48  |                  |
| JARID1B  | 5812-mir-155.txt |
| line 105 |                  |
| GNA13    | 5806-mir-29b.txt |
| line 49  |                  |
| GNA13    | 5809-mir-128.txt |
| line 429 |                  |
| BCL11B   | 5806-mir-29b.txt |
| line 52  |                  |
| BCL11B   | 5811-mir-144.txt |
| line 607 |                  |
| GNG12    | 5806-mir-29b.txt |
| line 55  |                  |
| GNG12    | 5809-mir-128.txt |

|          |     |                   |
|----------|-----|-------------------|
| line     | 423 |                   |
| CEP68    |     | 5806-mir-29b.txt  |
| line     | 56  |                   |
| CEP68    |     | 5811-mir-144.txt  |
| line     | 206 |                   |
| PAIP2    |     | 5806-mir-29b.txt  |
| line     | 59  |                   |
| PAIP2    |     | 5809-mir-128.txt  |
| line     | 13  |                   |
| PAIP2    |     | 5813-mir-200c.txt |
| line     | 14  |                   |
| BCORL1   |     | 5806-mir-29b.txt  |
| line     | 70  |                   |
| BCORL1   |     | 5809-mir-128.txt  |
| line     | 168 |                   |
| BCORL1   |     | 5810-mir-143.txt  |
| line     | 183 |                   |
| BCORL1   |     | 5812-mir-155.txt  |
| line     | 229 |                   |
| KIAA0644 |     | 5806-mir-29b.txt  |
| line     | 71  |                   |
| KIAA0644 |     | 5808-mir-125b.txt |
| line     | 87  |                   |
| KIAA0644 |     | 5809-mir-128.txt  |
| line     | 30  |                   |
| AMMECR1L |     | 5806-mir-29b.txt  |
| line     | 72  |                   |
| AMMECR1L |     | 5809-mir-128.txt  |
| line     | 203 |                   |
| RARB     |     | 5806-mir-29b.txt  |
| line     | 75  |                   |
| RARB     |     | 5811-mir-144.txt  |
| line     | 25  |                   |
| C6orf168 |     | 5806-mir-29b.txt  |
| line     | 76  |                   |
| C6orf168 |     | 5809-mir-128.txt  |
| line     | 579 |                   |

|                 |                   |
|-----------------|-------------------|
| C6orf168        | 5811-mir-144.txt  |
| line 85         |                   |
| FRAS1           | 5806-mir-29b.txt  |
| line 77         |                   |
| FRAS1           | 5808-mir-125b.txt |
| line 359        |                   |
| MGC21874        | 5806-mir-29b.txt  |
| line 82         |                   |
| MGC21874        | 5808-mir-125b.txt |
| line 385        |                   |
| MGC21874        | 5812-mir-155.txt  |
| line 171        |                   |
| LCORL           | 5806-mir-29b.txt  |
| line 83         |                   |
| LCORL           | 5812-mir-155.txt  |
| line 28         |                   |
| LL22NC03-75B3.6 | 5806-mir-29b.txt  |
| line 87         |                   |
| LL22NC03-75B3.6 | 5808-mir-125b.txt |
| line 163        |                   |
| RNF165          | 5806-mir-29b.txt  |
| line 90         |                   |
| RNF165          | 5810-mir-143.txt  |
| line 227        |                   |
| REPS2           | 5806-mir-29b.txt  |
| line 97         |                   |
| REPS2           | 5812-mir-155.txt  |
| line 151        |                   |
| C13orf23        | 5806-mir-29b.txt  |
| line 98         |                   |
| C13orf23        | 5811-mir-144.txt  |
| line 465        |                   |
| YWHAE           | 5806-mir-29b.txt  |
| line 102        |                   |
| YWHAE           | 5812-mir-155.txt  |
| line 258        |                   |

|          |                   |
|----------|-------------------|
| CNR1     | 5806-mir-29b.txt  |
| line 111 |                   |
| CNR1     | 5809-mir-128.txt  |
| line 369 |                   |
| KIAA1602 | 5806-mir-29b.txt  |
| line 116 |                   |
| KIAA1602 | 5808-mir-125b.txt |
| line 183 |                   |
| C18orf62 | 5806-mir-29b.txt  |
| line 117 |                   |
| C18orf62 | 5811-mir-144.txt  |
| line 551 |                   |
| GPR85    | 5806-mir-29b.txt  |
| line 125 |                   |
| GPR85    | 5811-mir-144.txt  |
| line 545 |                   |
| HNRNPF   | 5806-mir-29b.txt  |
| line 126 |                   |
| HNRNPF   | 5809-mir-128.txt  |
| line 631 |                   |
| HNRNPF   | 5811-mir-144.txt  |
| line 248 |                   |
| EPHA10   | 5806-mir-29b.txt  |
| line 133 |                   |
| EPHA10   | 5808-mir-125b.txt |
| line 378 |                   |
| KCNJ12   | 5806-mir-29b.txt  |
| line 138 |                   |
| KCNJ12   | 5808-mir-125b.txt |
| line 245 |                   |
| FAM53C   | 5806-mir-29b.txt  |
| line 151 |                   |
| FAM53C   | 5808-mir-125b.txt |
| line 327 |                   |
| RAB6B    | 5806-mir-29b.txt  |

|          |                   |
|----------|-------------------|
| line 155 |                   |
| RAB6B    | 5808-mir-125b.txt |
| line 154 |                   |
| CCDC28B  | 5806-mir-29b.txt  |
| line 156 |                   |
| CCDC28B  | 5809-mir-128.txt  |
| line 664 |                   |
| KBTBD8   | 5807-mir-99a.txt  |
| line 2   |                   |
| KBTBD8   | 5811-mir-144.txt  |
| line 272 |                   |
| TTC39A   | 5807-mir-99a.txt  |
| line 4   |                   |
| TTC39A   | 5809-mir-128.txt  |
| line 94  |                   |
| ADCY1    | 5807-mir-99a.txt  |
| line 7   |                   |
| ADCY1    | 5808-mir-125b.txt |
| line 262 |                   |
| ADCY1    | 5811-mir-144.txt  |
| line 529 |                   |
| GRHL1    | 5807-mir-99a.txt  |
| line 15  |                   |
| GRHL1    | 5808-mir-125b.txt |
| line 273 |                   |
| ZBTB7A   | 5807-mir-99a.txt  |
| line 24  |                   |
| ZBTB7A   | 5808-mir-125b.txt |
| line 263 |                   |
| NAIF1    | 5808-mir-125b.txt |
| line 4   |                   |
| NAIF1    | 5809-mir-128.txt  |
| line 685 |                   |
| BAP1     | 5808-mir-125b.txt |
| line 17  |                   |
| BAP1     | 5813-mir-200c.txt |



|         |     |                   |
|---------|-----|-------------------|
| line    | 7   |                   |
| MEGF9   |     | 5808-mir-125b.txt |
| line    | 19  |                   |
| MEGF9   |     | 5810-mir-143.txt  |
| line    | 155 |                   |
| MEGF9   |     | 5811-mir-144.txt  |
| line    | 253 |                   |
| PODXL   |     | 5808-mir-125b.txt |
| line    | 26  |                   |
| PODXL   |     | 5811-mir-144.txt  |
| line    | 324 |                   |
| SOX11   |     | 5808-mir-125b.txt |
| line    | 42  |                   |
| SOX11   |     | 5809-mir-128.txt  |
| line    | 627 |                   |
| SOX11   |     | 5811-mir-144.txt  |
| line    | 595 |                   |
| SOX11   |     | 5812-mir-155.txt  |
| line    | 121 |                   |
| CYP24A1 |     | 5808-mir-125b.txt |
| line    | 43  |                   |
| CYP24A1 |     | 5811-mir-144.txt  |
| line    | 120 |                   |
| RBAK    |     | 5808-mir-125b.txt |
| line    | 49  |                   |
| RBAK    |     | 5812-mir-155.txt  |
| line    | 7   |                   |
| LBH     |     | 5808-mir-125b.txt |
| line    | 60  |                   |
| LBH     |     | 5809-mir-128.txt  |
| line    | 71  |                   |
| LBH     |     | 5810-mir-143.txt  |
| line    | 179 |                   |
| NXF1    |     | 5808-mir-125b.txt |
| line    | 67  |                   |
| NXF1    |     | 5809-mir-128.txt  |
| line    | 763 |                   |

|          |                   |
|----------|-------------------|
| TDG      | 5808-mir-125b.txt |
| line 70  |                   |
| TDG      | 5811-mir-144.txt  |
| line 554 |                   |
| MAP3K10  | 5808-mir-125b.txt |
| line 74  |                   |
| MAP3K10  | 5812-mir-155.txt  |
| line 152 |                   |
| SLC35A4  | 5808-mir-125b.txt |
| line 79  |                   |
| SLC35A4  | 5810-mir-143.txt  |
| line 173 |                   |
| SLC25A15 | 5808-mir-125b.txt |
| line 88  |                   |
| SLC25A15 | 5810-mir-143.txt  |
| line 76  |                   |
| SYVN1    | 5808-mir-125b.txt |
| line 91  |                   |
| SYVN1    | 5812-mir-155.txt  |
| line 276 |                   |
| SLC4A4   | 5808-mir-125b.txt |
| line 101 |                   |
| SLC4A4   | 5811-mir-144.txt  |
| line 502 |                   |
| DIRAS1   | 5808-mir-125b.txt |
| line 110 |                   |
| DIRAS1   | 5809-mir-128.txt  |
| line 255 |                   |
| KLC2     | 5808-mir-125b.txt |
| line 122 |                   |
| KLC2     | 5810-mir-143.txt  |
| line 152 |                   |
| NT5DC1   | 5808-mir-125b.txt |
| line 124 |                   |
| NT5DC1   | 5811-mir-144.txt  |

|          |     |                   |
|----------|-----|-------------------|
| line     | 29  |                   |
| BMPR1B   |     | 5808-mir-125b.txt |
| line     | 129 |                   |
| BMPR1B   |     | 5811-mir-144.txt  |
| line     | 147 |                   |
| SMAD2    |     | 5808-mir-125b.txt |
| line     | 132 |                   |
| SMAD2    |     | 5809-mir-128.txt  |
| line     | 189 |                   |
| SMAD2    |     | 5812-mir-155.txt  |
| line     | 25  |                   |
| BRWD1    |     | 5808-mir-125b.txt |
| line     | 134 |                   |
| BRWD1    |     | 5812-mir-155.txt  |
| line     | 174 |                   |
| ALDH1A3  |     | 5808-mir-125b.txt |
| line     | 135 |                   |
| ALDH1A3  |     | 5811-mir-144.txt  |
| line     | 113 |                   |
| KPNA6    |     | 5808-mir-125b.txt |
| line     | 142 |                   |
| KPNA6    |     | 5809-mir-128.txt  |
| line     | 770 |                   |
| KPNA6    |     | 5811-mir-144.txt  |
| line     | 640 |                   |
| HCN4     |     | 5808-mir-125b.txt |
| line     | 147 |                   |
| HCN4     |     | 5809-mir-128.txt  |
| line     | 491 |                   |
| GALNT7   |     | 5808-mir-125b.txt |
| line     | 165 |                   |
| GALNT7   |     | 5809-mir-128.txt  |
| line     | 230 |                   |
| GALNT7   |     | 5811-mir-144.txt  |
| line     | 583 |                   |
| SLC39A13 |     | 5808-mir-125b.txt |

|          |                   |
|----------|-------------------|
| line 172 |                   |
| SLC39A13 | 5809-mir-128.txt  |
| line 303 |                   |
| ECE1     | 5808-mir-125b.txt |
| line 174 |                   |
| ECE1     | 5809-mir-128.txt  |
| line 82  |                   |
| ECE1     | 5811-mir-144.txt  |
| line 579 |                   |
| BCL2     | 5808-mir-125b.txt |
| line 176 |                   |
| BCL2     | 5810-mir-143.txt  |
| line 189 |                   |
| NCAN     | 5808-mir-125b.txt |
| line 177 |                   |
| NCAN     | 5809-mir-128.txt  |
| line 532 |                   |
| PPME1    | 5808-mir-125b.txt |
| line 186 |                   |
| PPME1    | 5809-mir-128.txt  |
| line 222 |                   |
| SEL1L    | 5808-mir-125b.txt |
| line 189 |                   |
| SEL1L    | 5811-mir-144.txt  |
| line 399 |                   |
| SMCR8    | 5808-mir-125b.txt |
| line 191 |                   |
| SMCR8    | 5809-mir-128.txt  |
| line 695 |                   |
| M6PR     | 5808-mir-125b.txt |
| line 197 |                   |
| M6PR     | 5810-mir-143.txt  |
| line 129 |                   |
| ABCC4    | 5808-mir-125b.txt |
| line 206 |                   |
| ABCC4    | 5810-mir-143.txt  |

|        |     |                   |
|--------|-----|-------------------|
| line   | 132 |                   |
| KCNH7  |     | 5808-mir-125b.txt |
| line   | 207 |                   |
| KCNH7  |     | 5811-mir-144.txt  |
| line   | 418 |                   |
| HOXB3  |     | 5808-mir-125b.txt |
| line   | 208 |                   |
| HOXB3  |     | 5809-mir-128.txt  |
| line   | 707 |                   |
| AKAP13 |     | 5808-mir-125b.txt |
| line   | 209 |                   |
| AKAP13 |     | 5810-mir-143.txt  |
| line   | 154 |                   |
| ELOVL6 |     | 5808-mir-125b.txt |
| line   | 212 |                   |
| ELOVL6 |     | 5809-mir-128.txt  |
| line   | 322 |                   |
| CDR2L  |     | 5808-mir-125b.txt |
| line   | 219 |                   |
| CDR2L  |     | 5809-mir-128.txt  |
| line   | 556 |                   |
| ZNF148 |     | 5808-mir-125b.txt |
| line   | 220 |                   |
| ZNF148 |     | 5810-mir-143.txt  |
| line   | 117 |                   |
| ZNF148 |     | 5811-mir-144.txt  |
| line   | 82  |                   |
| ATXN1  |     | 5808-mir-125b.txt |
| line   | 233 |                   |
| ATXN1  |     | 5811-mir-144.txt  |
| line   | 56  |                   |
| DOCK3  |     | 5808-mir-125b.txt |
| line   | 236 |                   |
| DOCK3  |     | 5811-mir-144.txt  |
| line   | 478 |                   |

|          |                   |
|----------|-------------------|
| FAM65B   | 5808-mir-125b.txt |
| line 237 |                   |
| FAM65B   | 5809-mir-128.txt  |
| line 637 |                   |
| PAFAH1B1 | 5808-mir-125b.txt |
| line 252 |                   |
| PAFAH1B1 | 5811-mir-144.txt  |
| line 48  |                   |
| STMN3    | 5808-mir-125b.txt |
| line 256 |                   |
| STMN3    | 5810-mir-143.txt  |
| line 238 |                   |
| CXorf23  | 5808-mir-125b.txt |
| line 265 |                   |
| CXorf23  | 5811-mir-144.txt  |
| line 177 |                   |
| ATP2B3   | 5808-mir-125b.txt |
| line 279 |                   |
| ATP2B3   | 5812-mir-155.txt  |
| line 137 |                   |
| SLC02A1  | 5808-mir-125b.txt |
| line 297 |                   |
| SLC02A1  | 5810-mir-143.txt  |
| line 187 |                   |
| TEGT     | 5808-mir-125b.txt |
| line 300 |                   |
| TEGT     | 5809-mir-128.txt  |
| line 195 |                   |
| TEGT     | 5811-mir-144.txt  |
| line 436 |                   |
| E2F3     | 5808-mir-125b.txt |
| line 306 |                   |
| E2F3     | 5809-mir-128.txt  |
| line 742 |                   |
| E2F2     | 5808-mir-125b.txt |
| line 310 |                   |

|         |     |                   |
|---------|-----|-------------------|
| E2F2    |     | 5812-mir-155.txt  |
| line    | 117 |                   |
| BRPF1   |     | 5808-mir-125b.txt |
| line    | 316 |                   |
| BRPF1   |     | 5811-mir-144.txt  |
| line    | 190 |                   |
| YWHAG   |     | 5808-mir-125b.txt |
| line    | 337 |                   |
| YWHAG   |     | 5811-mir-144.txt  |
| line    | 118 |                   |
| BACH1   |     | 5808-mir-125b.txt |
| line    | 347 |                   |
| BACH1   |     | 5811-mir-144.txt  |
| line    | 261 |                   |
| BACH1   |     | 5812-mir-155.txt  |
| line    | 3   |                   |
| PHC2    |     | 5808-mir-125b.txt |
| line    | 353 |                   |
| PHC2    |     | 5809-mir-128.txt  |
| line    | 570 |                   |
| PHC2    |     | 5812-mir-155.txt  |
| line    | 162 |                   |
| EPB41   |     | 5808-mir-125b.txt |
| line    | 361 |                   |
| EPB41   |     | 5809-mir-128.txt  |
| line    | 623 |                   |
| EPB41   |     | 5810-mir-143.txt  |
| line    | 259 |                   |
| EPB41   |     | 5811-mir-144.txt  |
| line    | 498 |                   |
| TSPAN14 |     | 5808-mir-125b.txt |
| line    | 365 |                   |
| TSPAN14 |     | 5812-mir-155.txt  |
| line    | 196 |                   |
| VANGL2  |     | 5808-mir-125b.txt |
| line    | 366 |                   |
| VANGL2  |     | 5809-mir-128.txt  |

|         |     |                   |
|---------|-----|-------------------|
| line    | 161 |                   |
| HMGB3   |     | 5808-mir-125b.txt |
| line    | 376 |                   |
| HMGB3   |     | 5809-mir-128.txt  |
| line    | 239 |                   |
| HMGB3   |     | 5812-mir-155.txt  |
| line    | 236 |                   |
| SLC23A2 |     | 5808-mir-125b.txt |
| line    | 394 |                   |
| SLC23A2 |     | 5811-mir-144.txt  |
| line    | 318 |                   |
| BBC3    |     | 5808-mir-125b.txt |
| line    | 402 |                   |
| BBC3    |     | 5810-mir-143.txt  |
| line    | 258 |                   |
| BBC3    |     | 5811-mir-144.txt  |
| line    | 313 |                   |
| COR01C  |     | 5808-mir-125b.txt |
| line    | 406 |                   |
| COR01C  |     | 5809-mir-128.txt  |
| line    | 411 |                   |
| ETNK2   |     | 5808-mir-125b.txt |
| line    | 412 |                   |
| ETNK2   |     | 5812-mir-155.txt  |
| line    | 238 |                   |
| AFF4    |     | 5809-mir-128.txt  |
| line    | 15  |                   |
| AFF4    |     | 5811-mir-144.txt  |
| line    | 95  |                   |
| SS18    |     | 5809-mir-128.txt  |
| line    | 17  |                   |
| SS18    |     | 5811-mir-144.txt  |
| line    | 26  |                   |
| FGD6    |     | 5809-mir-128.txt  |
| line    | 21  |                   |
| FGD6    |     | 5810-mir-143.txt  |



|          |                  |
|----------|------------------|
| line 203 |                  |
| FGD6     | 5811-mir-144.txt |
| line 7   |                  |
| SASH1    | 5809-mir-128.txt |
| line 73  |                  |
| SASH1    | 5811-mir-144.txt |
| line 479 |                  |
| SEC24A   | 5809-mir-128.txt |
| line 87  |                  |
| SEC24A   | 5811-mir-144.txt |
| line 84  |                  |
| BAZ2B    | 5809-mir-128.txt |
| line 95  |                  |
| BAZ2B    | 5811-mir-144.txt |
| line 215 |                  |
| SLC7A11  | 5809-mir-128.txt |
| line 98  |                  |
| SLC7A11  | 5810-mir-143.txt |
| line 28  |                  |
| SLC7A11  | 5811-mir-144.txt |
| line 14  |                  |
| MSL-1    | 5809-mir-128.txt |
| line 104 |                  |
| MSL-1    | 5810-mir-143.txt |
| line 201 |                  |
| MIPOL1   | 5809-mir-128.txt |
| line 105 |                  |
| MIPOL1   | 5810-mir-143.txt |
| line 71  |                  |
| COL21A1  | 5809-mir-128.txt |
| line 115 |                  |
| COL21A1  | 5812-mir-155.txt |
| line 115 |                  |
| ABBA-1   | 5809-mir-128.txt |
| line 130 |                  |
| ABBA-1   | 5811-mir-144.txt |

|            |     |                  |
|------------|-----|------------------|
| line       | 561 |                  |
| WNK1       |     | 5809-mir-128.txt |
| line       | 131 |                  |
| WNK1       |     | 5812-mir-155.txt |
| line       | 252 |                  |
| USP42      |     | 5809-mir-128.txt |
| line       | 142 |                  |
| USP42      |     | 5811-mir-144.txt |
| line       | 52  |                  |
| FLJ20309   |     | 5809-mir-128.txt |
| line       | 147 |                  |
| FLJ20309   |     | 5810-mir-143.txt |
| line       | 167 |                  |
| FLJ20309   |     | 5811-mir-144.txt |
| line       | 98  |                  |
| PPP1CC     |     | 5809-mir-128.txt |
| line       | 153 |                  |
| PPP1CC     |     | 5811-mir-144.txt |
| line       | 172 |                  |
| C20orf194  |     | 5809-mir-128.txt |
| line       | 159 |                  |
| C20orf194  |     | 5811-mir-144.txt |
| line       | 455 |                  |
| C10orf26   |     | 5809-mir-128.txt |
| line       | 191 |                  |
| C10orf26   |     | 5812-mir-155.txt |
| line       | 97  |                  |
| FAM126B    |     | 5809-mir-128.txt |
| line       | 196 |                  |
| FAM126B    |     | 5811-mir-144.txt |
| line       | 202 |                  |
| ST6GALNAC3 |     | 5809-mir-128.txt |
| line       | 197 |                  |
| ST6GALNAC3 |     | 5811-mir-144.txt |
| line       | 409 |                  |

|          |                   |
|----------|-------------------|
| MED13    | 5809-mir-128.txt  |
| line 201 |                   |
| MED13    | 5811-mir-144.txt  |
| line 110 |                   |
| NDST1    | 5809-mir-128.txt  |
| line 224 |                   |
| NDST1    | 5813-mir-200c.txt |
| line 34  |                   |
| SPATA2   | 5809-mir-128.txt  |
| line 240 |                   |
| SPATA2   | 5811-mir-144.txt  |
| line 620 |                   |
| PDGFRA   | 5809-mir-128.txt  |
| line 243 |                   |
| PDGFRA   | 5810-mir-143.txt  |
| line 228 |                   |
| SLC39A11 | 5809-mir-128.txt  |
| line 273 |                   |
| SLC39A11 | 5810-mir-143.txt  |
| line 46  |                   |
| FLJ10404 | 5809-mir-128.txt  |
| line 278 |                   |
| FLJ10404 | 5811-mir-144.txt  |
| line 401 |                   |
| CPD      | 5809-mir-128.txt  |
| line 281 |                   |
| CPD      | 5810-mir-143.txt  |
| line 77  |                   |
| MCF2L    | 5809-mir-128.txt  |
| line 286 |                   |
| MCF2L    | 5811-mir-144.txt  |
| line 244 |                   |
| MET      | 5809-mir-128.txt  |
| line 290 |                   |
| MET      | 5811-mir-144.txt  |
| line 630 |                   |

|          |                  |
|----------|------------------|
| KIAA1033 | 5809-mir-128.txt |
| line 309 |                  |
| KIAA1033 | 5811-mir-144.txt |
| line 194 |                  |
| FLRT2    | 5809-mir-128.txt |
| line 330 |                  |
| FLRT2    | 5811-mir-144.txt |
| line 588 |                  |
| TCF4     | 5809-mir-128.txt |
| line 331 |                  |
| TCF4     | 5812-mir-155.txt |
| line 22  |                  |
| NRK      | 5809-mir-128.txt |
| line 333 |                  |
| NRK      | 5811-mir-144.txt |
| line 603 |                  |
| TNRC18   | 5809-mir-128.txt |
| line 360 |                  |
| TNRC18   | 5811-mir-144.txt |
| line 635 |                  |
| CEP135   | 5809-mir-128.txt |
| line 361 |                  |
| CEP135   | 5811-mir-144.txt |
| line 312 |                  |
| ZNF652   | 5809-mir-128.txt |
| line 363 |                  |
| ZNF652   | 5812-mir-155.txt |
| line 5   |                  |
| TAL1     | 5809-mir-128.txt |
| line 365 |                  |
| TAL1     | 5811-mir-144.txt |
| line 573 |                  |
| BHLHB3   | 5809-mir-128.txt |
| line 366 |                  |
| BHLHB3   | 5811-mir-144.txt |

|           |     |                  |
|-----------|-----|------------------|
| line      | 233 |                  |
| MED14     |     | 5809-mir-128.txt |
| line      | 367 |                  |
| MED14     |     | 5811-mir-144.txt |
| line      | 201 |                  |
| FUBP3     |     | 5809-mir-128.txt |
| line      | 371 |                  |
| FUBP3     |     | 5811-mir-144.txt |
| line      | 171 |                  |
| MAPK6     |     | 5809-mir-128.txt |
| line      | 378 |                  |
| MAPK6     |     | 5811-mir-144.txt |
| line      | 18  |                  |
| SP4       |     | 5809-mir-128.txt |
| line      | 389 |                  |
| SP4       |     | 5811-mir-144.txt |
| line      | 60  |                  |
| TGIF2     |     | 5809-mir-128.txt |
| line      | 396 |                  |
| TGIF2     |     | 5811-mir-144.txt |
| line      | 393 |                  |
| RAB11FIP1 |     | 5809-mir-128.txt |
| line      | 403 |                  |
| RAB11FIP1 |     | 5810-mir-143.txt |
| line      | 126 |                  |
| MYST2     |     | 5809-mir-128.txt |
| line      | 406 |                  |
| MYST2     |     | 5810-mir-143.txt |
| line      | 217 |                  |
| MYST2     |     | 5811-mir-144.txt |
| line      | 632 |                  |
| TROVE2    |     | 5809-mir-128.txt |
| line      | 408 |                  |
| TROVE2    |     | 5811-mir-144.txt |
| line      | 319 |                  |

|          |                  |
|----------|------------------|
| RPGRIP1L | 5809-mir-128.txt |
| line 414 |                  |
| RPGRIP1L | 5811-mir-144.txt |
| line 374 |                  |
| NR2F2    | 5809-mir-128.txt |
| line 421 |                  |
| NR2F2    | 5811-mir-144.txt |
| line 148 |                  |
| SFRP1    | 5809-mir-128.txt |
| line 431 |                  |
| SFRP1    | 5811-mir-144.txt |
| line 360 |                  |
| UST      | 5809-mir-128.txt |
| line 438 |                  |
| UST      | 5812-mir-155.txt |
| line 250 |                  |
| HAPLN1   | 5809-mir-128.txt |
| line 441 |                  |
| HAPLN1   | 5811-mir-144.txt |
| line 525 |                  |
| ITSN2    | 5809-mir-128.txt |
| line 444 |                  |
| ITSN2    | 5811-mir-144.txt |
| line 343 |                  |
| MYH10    | 5809-mir-128.txt |
| line 447 |                  |
| MYH10    | 5811-mir-144.txt |
| line 342 |                  |
| SLC39A10 | 5809-mir-128.txt |
| line 453 |                  |
| SLC39A10 | 5810-mir-143.txt |
| line 208 |                  |
| SLC39A10 | 5811-mir-144.txt |
| line 532 |                  |
| SLC39A10 | 5812-mir-155.txt |
| line 170 |                  |

|        |     |                   |
|--------|-----|-------------------|
| KLF3   |     | 5809-mir-128.txt  |
| line   | 460 |                   |
| KLF3   |     | 5811-mir-144.txt  |
| line   | 238 |                   |
| KLF3   |     | 5812-mir-155.txt  |
| line   | 101 |                   |
| KLF3   |     | 5813-mir-200c.txt |
| line   | 27  |                   |
| CDH11  |     | 5809-mir-128.txt  |
| line   | 461 |                   |
| CDH11  |     | 5811-mir-144.txt  |
| line   | 335 |                   |
| ZHX1   |     | 5809-mir-128.txt  |
| line   | 465 |                   |
| ZHX1   |     | 5811-mir-144.txt  |
| line   | 218 |                   |
| CCNK   |     | 5809-mir-128.txt  |
| line   | 477 |                   |
| CCNK   |     | 5811-mir-144.txt  |
| line   | 427 |                   |
| SEMA6A |     | 5809-mir-128.txt  |
| line   | 479 |                   |
| SEMA6A |     | 5811-mir-144.txt  |
| line   | 264 |                   |
| KLF4   |     | 5809-mir-128.txt  |
| line   | 485 |                   |
| KLF4   |     | 5813-mir-200c.txt |
| line   | 17  |                   |
| NCOA7  |     | 5809-mir-128.txt  |
| line   | 486 |                   |
| NCOA7  |     | 5811-mir-144.txt  |
| line   | 438 |                   |
| NOVA1  |     | 5809-mir-128.txt  |
| line   | 496 |                   |
| NOVA1  |     | 5810-mir-143.txt  |
| line   | 226 |                   |
| NOVA1  |     | 5811-mir-144.txt  |

|          |     |                  |
|----------|-----|------------------|
| line     | 546 |                  |
| NOVA1    |     | 5812-mir-155.txt |
| line     | 200 |                  |
| ABCC5    |     | 5809-mir-128.txt |
| line     | 501 |                  |
| ABCC5    |     | 5811-mir-144.txt |
| line     | 552 |                  |
| DDAH1    |     | 5809-mir-128.txt |
| line     | 513 |                  |
| DDAH1    |     | 5810-mir-143.txt |
| line     | 73  |                  |
| GNS      |     | 5809-mir-128.txt |
| line     | 516 |                  |
| GNS      |     | 5810-mir-143.txt |
| line     | 101 |                  |
| N4BP1    |     | 5809-mir-128.txt |
| line     | 523 |                  |
| N4BP1    |     | 5812-mir-155.txt |
| line     | 233 |                  |
| PAPPA    |     | 5809-mir-128.txt |
| line     | 526 |                  |
| PAPPA    |     | 5811-mir-144.txt |
| line     | 352 |                  |
| C12orf34 |     | 5809-mir-128.txt |
| line     | 534 |                  |
| C12orf34 |     | 5811-mir-144.txt |
| line     | 642 |                  |
| SPTBN1   |     | 5809-mir-128.txt |
| line     | 535 |                  |
| SPTBN1   |     | 5811-mir-144.txt |
| line     | 448 |                  |
| APPBP2   |     | 5809-mir-128.txt |
| line     | 540 |                  |
| APPBP2   |     | 5811-mir-144.txt |
| line     | 50  |                  |



|          |                  |
|----------|------------------|
| RNF139   | 5809-mir-128.txt |
| line 542 |                  |
| RNF139   | 5811-mir-144.txt |
| line 513 |                  |
| TAPT1    | 5809-mir-128.txt |
| line 545 |                  |
| TAPT1    | 5812-mir-155.txt |
| line 35  |                  |
| LIMK1    | 5809-mir-128.txt |
| line 553 |                  |
| LIMK1    | 5810-mir-143.txt |
| line 216 |                  |
| ARFGEF1  | 5809-mir-128.txt |
| line 554 |                  |
| ARFGEF1  | 5811-mir-144.txt |
| line 439 |                  |
| AGRN     | 5809-mir-128.txt |
| line 559 |                  |
| AGRN     | 5811-mir-144.txt |
| line 626 |                  |
| NOL4     | 5809-mir-128.txt |
| line 566 |                  |
| NOL4     | 5811-mir-144.txt |
| line 309 |                  |
| KIAA1012 | 5809-mir-128.txt |
| line 567 |                  |
| KIAA1012 | 5810-mir-143.txt |
| line 95  |                  |
| KIAA1012 | 5811-mir-144.txt |
| line 191 |                  |
| PANK1    | 5809-mir-128.txt |
| line 569 |                  |
| PANK1    | 5811-mir-144.txt |
| line 168 |                  |
| ANKS1A   | 5809-mir-128.txt |
| line 581 |                  |

|          |                  |
|----------|------------------|
| ANKS1A   | 5811-mir-144.txt |
| line 481 |                  |
| ELFN2    | 5809-mir-128.txt |
| line 582 |                  |
| ELFN2    | 5811-mir-144.txt |
| line 602 |                  |
| ATP6V1A  | 5809-mir-128.txt |
| line 586 |                  |
| ATP6V1A  | 5810-mir-143.txt |
| line 13  |                  |
| ATP6V1A  | 5811-mir-144.txt |
| line 508 |                  |
| UPF1     | 5809-mir-128.txt |
| line 592 |                  |
| UPF1     | 5810-mir-143.txt |
| line 177 |                  |
| ELL2     | 5809-mir-128.txt |
| line 596 |                  |
| ELL2     | 5811-mir-144.txt |
| line 415 |                  |
| ELL2     | 5812-mir-155.txt |
| line 269 |                  |
| CACNA1A  | 5809-mir-128.txt |
| line 608 |                  |
| CACNA1A  | 5810-mir-143.txt |
| line 40  |                  |
| CNN3     | 5809-mir-128.txt |
| line 611 |                  |
| CNN3     | 5811-mir-144.txt |
| line 432 |                  |
| SPOPL    | 5809-mir-128.txt |
| line 621 |                  |
| SPOPL    | 5811-mir-144.txt |
| line 143 |                  |
| RAPGEF2  | 5809-mir-128.txt |
| line 625 |                  |

|          |                  |
|----------|------------------|
| RAPGEF2  | 5811-mir-144.txt |
| line 378 |                  |
| MARCKS   | 5809-mir-128.txt |
| line 626 |                  |
| MARCKS   | 5810-mir-143.txt |
| line 200 |                  |
| MARCKS   | 5811-mir-144.txt |
| line 493 |                  |
| DUSP5    | 5809-mir-128.txt |
| line 633 |                  |
| DUSP5    | 5811-mir-144.txt |
| line 617 |                  |
| ARID2    | 5809-mir-128.txt |
| line 634 |                  |
| ARID2    | 5811-mir-144.txt |
| line 59  |                  |
| ARID2    | 5812-mir-155.txt |
| line 15  |                  |
| RUNX1    | 5809-mir-128.txt |
| line 658 |                  |
| RUNX1    | 5811-mir-144.txt |
| line 139 |                  |
| HEG1     | 5809-mir-128.txt |
| line 662 |                  |
| HEG1     | 5811-mir-144.txt |
| line 541 |                  |
| GDF6     | 5809-mir-128.txt |
| line 667 |                  |
| GDF6     | 5812-mir-155.txt |
| line 46  |                  |
| LARP4    | 5809-mir-128.txt |
| line 673 |                  |
| LARP4    | 5810-mir-143.txt |
| line 118 |                  |
| PDE3B    | 5809-mir-128.txt |
| line 690 |                  |

|          |     |                   |
|----------|-----|-------------------|
| PDE3B    |     | 5811-mir-144.txt  |
| line     | 443 |                   |
| NAV3     |     | 5809-mir-128.txt  |
| line     | 699 |                   |
| NAV3     |     | 5811-mir-144.txt  |
| line     | 371 |                   |
| NAV3     |     | 5812-mir-155.txt  |
| line     | 203 |                   |
| KIAA0232 |     | 5809-mir-128.txt  |
| line     | 702 |                   |
| KIAA0232 |     | 5811-mir-144.txt  |
| line     | 420 |                   |
| ZC3H12C  |     | 5809-mir-128.txt  |
| line     | 715 |                   |
| ZC3H12C  |     | 5811-mir-144.txt  |
| line     | 180 |                   |
| CDH5     |     | 5809-mir-128.txt  |
| line     | 724 |                   |
| CDH5     |     | 5811-mir-144.txt  |
| line     | 397 |                   |
| GATA2    |     | 5809-mir-128.txt  |
| line     | 732 |                   |
| GATA2    |     | 5813-mir-200c.txt |
| line     | 25  |                   |
| EDAR     |     | 5809-mir-128.txt  |
| line     | 735 |                   |
| EDAR     |     | 5811-mir-144.txt  |
| line     | 587 |                   |
| MYT1     |     | 5809-mir-128.txt  |
| line     | 746 |                   |
| MYT1     |     | 5811-mir-144.txt  |
| line     | 559 |                   |
| C17orf63 |     | 5809-mir-128.txt  |
| line     | 748 |                   |
| C17orf63 |     | 5811-mir-144.txt  |
| line     | 314 |                   |

|          |     |                   |
|----------|-----|-------------------|
| TANC2    |     | 5809-mir-128.txt  |
| line     | 761 |                   |
| TANC2    |     | 5810-mir-143.txt  |
| line     | 198 |                   |
| PRPF19   |     | 5809-mir-128.txt  |
| line     | 767 |                   |
| PRPF19   |     | 5810-mir-143.txt  |
| line     | 164 |                   |
| SURF4    |     | 5809-mir-128.txt  |
| line     | 772 |                   |
| SURF4    |     | 5813-mir-200c.txt |
| line     | 21  |                   |
| KCMF1    |     | 5809-mir-128.txt  |
| line     | 774 |                   |
| KCMF1    |     | 5810-mir-143.txt  |
| line     | 182 |                   |
| KCMF1    |     | 5811-mir-144.txt  |
| line     | 317 |                   |
| ARHGAP26 |     | 5810-mir-143.txt  |
| line     | 9   |                   |
| ARHGAP26 |     | 5811-mir-144.txt  |
| line     | 46  |                   |
| PAPD5    |     | 5810-mir-143.txt  |
| line     | 10  |                   |
| PAPD5    |     | 5811-mir-144.txt  |
| line     | 251 |                   |
| KRAS     |     | 5810-mir-143.txt  |
| line     | 21  |                   |
| KRAS     |     | 5812-mir-155.txt  |
| line     | 102 |                   |
| INADL    |     | 5810-mir-143.txt  |
| line     | 30  |                   |
| INADL    |     | 5812-mir-155.txt  |
| line     | 146 |                   |
| USP54    |     | 5810-mir-143.txt  |

|         |     |                  |
|---------|-----|------------------|
| line    | 35  |                  |
| USP54   |     | 5811-mir-144.txt |
| line    | 386 |                  |
| ALS2    |     | 5810-mir-143.txt |
| line    | 42  |                  |
| ALS2    |     | 5811-mir-144.txt |
| line    | 28  |                  |
| FAR1    |     | 5810-mir-143.txt |
| line    | 51  |                  |
| FAR1    |     | 5812-mir-155.txt |
| line    | 18  |                  |
| GDF10   |     | 5810-mir-143.txt |
| line    | 68  |                  |
| GDF10   |     | 5811-mir-144.txt |
| line    | 138 |                  |
| FAM60A  |     | 5810-mir-143.txt |
| line    | 124 |                  |
| FAM60A  |     | 5811-mir-144.txt |
| line    | 195 |                  |
| STRN3   |     | 5810-mir-143.txt |
| line    | 145 |                  |
| STRN3   |     | 5812-mir-155.txt |
| line    | 165 |                  |
| CACNA1C |     | 5810-mir-143.txt |
| line    | 172 |                  |
| CACNA1C |     | 5812-mir-155.txt |
| line    | 267 |                  |
| TRPS1   |     | 5810-mir-143.txt |
| line    | 186 |                  |
| TRPS1   |     | 5812-mir-155.txt |
| line    | 134 |                  |
| ABHD2   |     | 5810-mir-143.txt |
| line    | 194 |                  |
| ABHD2   |     | 5812-mir-155.txt |
| line    | 245 |                  |

|          |                   |
|----------|-------------------|
| COL5A2   | 5810-mir-143.txt  |
| line 236 |                   |
| COL5A2   | 5811-mir-144.txt  |
| line 419 |                   |
| PTGS2    | 5810-mir-143.txt  |
| line 239 |                   |
| PTGS2    | 5811-mir-144.txt  |
| line 451 |                   |
| RALGPS1  | 5810-mir-143.txt  |
| line 240 |                   |
| RALGPS1  | 5811-mir-144.txt  |
| line 549 |                   |
| FLJ20160 | 5810-mir-143.txt  |
| line 263 |                   |
| FLJ20160 | 5811-mir-144.txt  |
| line 69  |                   |
| USP47    | 5811-mir-144.txt  |
| line 42  |                   |
| USP47    | 5813-mir-200c.txt |
| line 16  |                   |
| FGF7     | 5811-mir-144.txt  |
| line 71  |                   |
| FGF7     | 5812-mir-155.txt  |
| line 59  |                   |
| MYBL1    | 5811-mir-144.txt  |
| line 74  |                   |
| MYBL1    | 5812-mir-155.txt  |
| line 78  |                   |
| SALL1    | 5811-mir-144.txt  |
| line 86  |                   |
| SALL1    | 5812-mir-155.txt  |
| line 244 |                   |
| ZNF238   | 5811-mir-144.txt  |
| line 100 |                   |
| ZNF238   | 5812-mir-155.txt  |
| line 235 |                   |

|          |     |                  |
|----------|-----|------------------|
| FAM130A1 |     | 5811-mir-144.txt |
| line     | 134 |                  |
| FAM130A1 |     | 5812-mir-155.txt |
| line     | 29  |                  |
| SCN1A    |     | 5811-mir-144.txt |
| line     | 161 |                  |
| SCN1A    |     | 5812-mir-155.txt |
| line     | 190 |                  |
| BTBD3    |     | 5811-mir-144.txt |
| line     | 245 |                  |
| BTBD3    |     | 5812-mir-155.txt |
| line     | 183 |                  |
| KPNA1    |     | 5811-mir-144.txt |
| line     | 246 |                  |
| KPNA1    |     | 5812-mir-155.txt |
| line     | 75  |                  |
| TSHZ3    |     | 5811-mir-144.txt |
| line     | 256 |                  |
| TSHZ3    |     | 5812-mir-155.txt |
| line     | 12  |                  |
| MEF2A    |     | 5811-mir-144.txt |
| line     | 257 |                  |
| MEF2A    |     | 5812-mir-155.txt |
| line     | 73  |                  |
| SOX1     |     | 5811-mir-144.txt |
| line     | 288 |                  |
| SOX1     |     | 5812-mir-155.txt |
| line     | 181 |                  |
| WEE1     |     | 5811-mir-144.txt |
| line     | 294 |                  |
| WEE1     |     | 5812-mir-155.txt |
| line     | 88  |                  |
| PKN2     |     | 5811-mir-144.txt |
| line     | 323 |                  |
| PKN2     |     | 5812-mir-155.txt |



|         |     |                   |
|---------|-----|-------------------|
| line    | 122 |                   |
| RREB1   |     | 5811-mir-144.txt  |
| line    | 422 |                   |
| RREB1   |     | 5812-mir-155.txt  |
| line    | 156 |                   |
| ZNRF3   |     | 5811-mir-144.txt  |
| line    | 430 |                   |
| ZNRF3   |     | 5812-mir-155.txt  |
| line    | 217 |                   |
| PTP4A1  |     | 5811-mir-144.txt  |
| line    | 483 |                   |
| PTP4A1  |     | 5813-mir-200c.txt |
| line    | 26  |                   |
| RSP02   |     | 5811-mir-144.txt  |
| line    | 487 |                   |
| RSP02   |     | 5812-mir-155.txt  |
| line    | 234 |                   |
| STXBP5L |     | 5811-mir-144.txt  |
| line    | 608 |                   |
| STXBP5L |     | 5812-mir-155.txt  |
| line    | 56  |                   |
| NUFIP2  |     | 5811-mir-144.txt  |
| line    | 627 |                   |
| NUFIP2  |     | 5812-mir-155.txt  |
| line    | 253 |                   |
| PSKH1   |     | 5811-mir-144.txt  |
| line    | 644 |                   |
| PSKH1   |     | 5812-mir-155.txt  |
| line    | 231 |                   |
