# Supplementary material for: From Oxidative Stress Damage to Pathways, Networks, and Autophagy via MicroRNAs
Source: Oxid Med Cell Longev. 2018 Apr 12;2018:4968321. doi: 10.1155/2018/4968321 (PMC5932428; doi:10.1155/2018/4968321)
Supplement: Supplementary 1 — Table 1: common gene targets of microRNAs with possible roles in oxidative stress. This table is an Excel format of Table 1. [file 4968321.f1.xlsx]

## Sheet: Suppl. Table 1
	Suppl. Table 1. Common gene targets of microRNAs with possible role in oxidative stress.
	This Table is an Excel format of Table 1
	Target gene	Annotation	Common miRNAs
	ZNF618	Zinc finger protein 618	hsa-miR-9
			hsa-miR-22
			hsa-miR-125b
			hsa-miR-128
			hsa-miR-143
			hsa-miR-144
			hsa-miR-155
	SH3PXD2A	SH3 and PX domains 2A	hsa-miR-9
			hsa-miR-22
			hsa-miR-29b
			hsa-miR-143
			hsa-miR-144
			hsa-miR-155
	TNRC6B	Trinucleotide repeat containing 6B	hsa-miR-9
			hsa-miR-16
			hsa-miR-29b
			hsa-miR-128
			hsa-miR-144
			hsa-miR-22
	CBL	Cas-Br-M (murine) ecotropic retroviral transforming sequence	Let-7f
			hsa-miR-9
			hsa-miR-22
			hsa-miR-143
			hsa-miR-155
	CPEB3	Cytoplasmic polyadenylation element binding protein 3	hsa-miR-9
			hsa-miR-16
			hsa-miR-21
			hsa-miR-128
			hsa-miR-144
	PPARA	Peroxisome proliferator-activated receptor alpha	hsa-miR-9
			hsa-miR-22
			hsa-miR-21
			hsa-miR-128
			hsa-miR-144
	CLCN5	Chloride channel 5 (nephrolithiasis 2, X-linked, Dent disease)	hsa-miR-9
			hsa-miR-16
			hsa-miR-22
			hsa-miR-128
			hsa-miR-155
	CDC14B	CDC14 cell division cycle 14 homolog B (S. cerevisiae)	hsa-miR-9
			hsa-miR-16
			hsa-miR-125b
			hsa-miR-128
			hsa-miR-144
	LIFR	Leukemia inhibitory factor receptor alpha	hsa-miR-9
			hsa-miR-143
			hsa-miR-21
			hsa-miR-128
			hsa-miR-144
	KCNA1	Potassium voltage-gated channel, shaker-related subfamily, member 1 (episodic ataxia with myokymia)	hsa-miR-9
			hsa-miR-155
			hsa-miR-21
			hsa-miR-128
			hsa-miR-144
	USP31	Ubiquitin specific peptidase 31	hsa-miR-9
			hsa-miR-16
			hsa-miR-155
			hsa-miR-200c
			hsa-miR-144
	tcag7.1228	Hypothetical protein FLJ25778	hsa-miR-9
			hsa-miR-16
			hsa-miR-21
			hsa-miR-128
			hsa-miR-144
	NFIB	Nuclear factor I/B	hsa-miR-9
			hsa-miR-22
			hsa-miR-21
			hsa-miR-128
			hsa-miR-29b
