# Supplementary material for: From Oxidative Stress Damage to Pathways, Networks, and Autophagy via MicroRNAs
Source: Oxid Med Cell Longev. 2018 Apr 12;2018:4968321. doi: 10.1155/2018/4968321 (PMC5932428; doi:10.1155/2018/4968321)
Supplement: Supplementary 5 — Table 5: common pathways (KEGG pathway IDs) of microRNAs associated with oxidative stress. This table is an Excel format of Table 3. [file 4968321.f5.xlsx]

## Sheet: Suppl. Table 5
	Suppl. Table 5: Common pathways (KEGG Pathway IDs) of microRNAs associated with oxidative stress.
	This Table is an Excel format of Table 3
	Common miRNAs	Target genes
	hsa-miR-9	CBL	CPEB3	PPARA	CLCN5	CDC14B	LIFR	KCNA1	USP31	ZNF618	tcag7.1228	NFIB	SH3PXD2A	TNRC6B
	hsa-miR-548c-3p	CBL	CPEB3	PPARA	CDC14B	LIFR	KCNA1	USP31	ZNF618	tcag7.1228	NFIB	SH3PXD2A	TNRC6B
	hsa-miR-128	CBL	CPEB3	PPARA	CLCN5	CDC14B	LIFR	KCNA1	ZNF618	tcag7.1228	NFIB	TNRC6B
	hsa-miR-144	CBL	CPEB3	PPARA	CDC14B	LIFR	KCNA1	USP31	ZNF618	tcag7.1228	SH3PXD2A	TNRC6B
	hsa-miR-548n	CPEB3	PPARA	CLCN5	CDC14B	LIFR	KCNA1	USP31	ZNF618	NFIB	SH3PXD2A	TNRC6B
	hsa-miR-655	CBL	CPEB3	LIFR	KCNA1	USP31	ZNF618	tcag7.1228	NFIB	SH3PXD2A	TNRC6B
	hsa-miR-548p	CBL	CPEB3	PPARA	LIFR	KCNA1	USP31	ZNF618	tcag7.1228	NFIB	TNRC6B
	hsa-miR-101	CBL	CPEB3	PPARA	LIFR	KCNA1	ZNF618	tcag7.1228	NFIB	SH3PXD2A	TNRC6B
	hsa-miR-29a/b/c	CBL	CPEB3	PPARA	CLCN5	LIFR	ZNF618	tcag7.1228	NFIB	SH3PXD2A	TNRC6B
	hsa-miR-195	CBL	CPEB3	PPARA	CLCN5	CDC14B	KCNA1	USP31	tcag7.1228	TNRC6B
	hsa-miR-16	CBL	CPEB3	PPARA	CLCN5	CDC14B	KCNA1	USP31	tcag7.1228	TNRC6B
	hsa-miR-424	CBL	CPEB3	PPARA	CLCN5	CDC14B	KCNA1	USP31	tcag7.1228	TNRC6B
	hsa-miR-15a/b	CBL	CPEB3	PPARA	CLCN5	CDC14B	KCNA1	USP31	tcag7.1228	TNRC6B
	hsa-miR-497	CBL	CPEB3	PPARA	CLCN5	CDC14B	KCNA1	USP31	tcag7.1228	TNRC6B
	hsa-miR-23a/b	CBL	PPARA	LIFR	KCNA1	USP31	tcag7.1228	NFIB	SH3PXD2A	TNRC6B
	hsa-miR-27a/b	CPEB3	PPARA	CLCN5	CDC14B	LIFR	KCNA1	USP31	NFIB	TNRC6B
	hsa-miR-519a/b-3p/c-3p	CPEB3	PPARA	KCNA1	USP31	ZNF618	tcag7.1228	NFIB	SH3PXD2A	TNRC6B
	hsa-miR-106a/b	CPEB3	PPARA	LIFR	KCNA1	USP31	ZNF618	NFIB	SH3PXD2A	TNRC6B
	hsa-miR-17	CPEB3	PPARA	LIFR	KCNA1	USP31	ZNF618	NFIB	SH3PXD2A	TNRC6B
	hsa-miR-20a/b	CPEB3	PPARA	LIFR	KCNA1	USP31	ZNF618	NFIB	SH3PXD2A	TNRC6B
	hsa-miR-93	CPEB3	PPARA	LIFR	KCNA1	USP31	ZNF618	NFIB	SH3PXD2A	TNRC6B
	hsa-miR-590-3p	PPARA	LIFR	KCNA1	USP31	ZNF618	tcag7.1228	NFIB	SH3PXD2A	TNRC6B
	hsa-miR-124	CBL	PPARA	CDC14B	KCNA1	ZNF618	tcag7.1228	NFIB	SH3PXD2A	TNRC6B
	hsa-miR-506	CBL	PPARA	CDC14B	KCNA1	ZNF618	tcag7.1228	NFIB	SH3PXD2A	TNRC6B
	hsa-miR-513a-3p	CBL	PPARA	LIFR	KCNA1	USP31	ZNF618	tcag7.1228	SH3PXD2A	TNRC6B
	hsa-miR-429	CBL	CDC14B	LIFR	KCNA1	USP31	tcag7.1228	NFIB	SH3PXD2A	TNRC6B
	hsa-miR-200b/c	CBL	PPARA	CDC14B	LIFR	KCNA1	USP31	tcag7.1228	NFIB	SH3PXD2A
